# Supplementary material for: Proteogenomic analyses indicate bacterial methylotrophy and archaeal heterotrophy are prevalent below the grass root zone
Source: PeerJ. 2016 Nov 8;4:e2687. doi: 10.7717/peerj.2687 (PMC5103831; doi:10.7717/peerj.2687)
Supplement: Figure S4 — Rows indicate draft genomes and columns indicate lists of individual genes, with the exception of PQQ biosynthesis where many subunits are represented in a single list. [file peerj-04-2687-s004.pdf]

|                                              |    | PQQ biosynthesis | PQQ-dependent dehydrogenase | Formaldehyde-activating enzyme (Fae) | Tetrahyromethanopterin N <sup>6</sup> -formyltransferase (Mdh) | Methylene-tetrahydromethanopterin cyclohydrilase (Pmt) | 5,10-Methyltetrahydromethanopterin ligase (FrlL) | Serine Cyste-glyoxime hydrosymmetryl transferase (NdcA) | Serine Cycle-Glycerate dehydrogenase (Gda) | Serine Cycle-phosphoenolpyruvate carboxylase | Serine Cycle-maleate dehydrogenase (Gda) | Serine Cycle-maleic-CoA lyase | Serine Cycle-glucose-2-kynase | Serine (RokU) ascorbate hydroxylase(4-2-1-3) 2013 | Serine (RokU) l-isolate synthase(4-3-1) 2013 | Serine (RokU)-citrate synthase(2-3-3-1) 2013 | Serine (RokU)-isocitrate dehydrogenase(1-1-4-2) |    |   |    |    |    |    |    |   |
|----------------------------------------------|----|------------------|-----------------------------|--------------------------------------|----------------------------------------------------------------|--------------------------------------------------------|--------------------------------------------------|---------------------------------------------------------|--------------------------------------------|----------------------------------------------|------------------------------------------|-------------------------------|-------------------------------|---------------------------------------------------|----------------------------------------------|----------------------------------------------|-------------------------------------------------|----|---|----|----|----|----|----|---|
| I3_1_20CM_2_Gemmatimonadets-rel_maybe_71-... | 1  | 3                | 1                           | 2                                    | 3                                                              | 2                                                      | 1                                                | 1                                                       | 3                                          |                                              |                                          |                               |                               | 1                                                 |                                              |                                              |                                                 | 1  | 1 |    |    |    |    |    |   |
| 13_1_20CM_4_Gemmatimonadetes_69_16           | 3  | 2                | 1                           | 1                                    | 1                                                              | 1                                                      | 1                                                | 1                                                       | 2                                          | 1                                            |                                          | 1                             | 1                             | 2                                                 | 1                                            | 2                                            | 2                                               | 1  |   | 1  | 1  | 1  | 2  | 2  |   |
| 13_1_20CM_Gemmatimonadetes_69_28             | 3  | 1                | 2                           | 1                                    | 1                                                              | 1                                                      | 1                                                |                                                         | 1                                          |                                              |                                          | 2                             |                               | 2                                                 | 1                                            | 2                                            | 2                                               | 1  |   | 1  |    | 1  | 1  | 2  |   |
| 13_1_40CM_2_Gemmatimonadetes_69_13           | 3  | 1                | 1                           | 1                                    | 1                                                              | 1                                                      | 1                                                | 2                                                       | 3                                          | 1                                            | 1                                        | 3                             | 1                             | 2                                                 | 1                                            | 3                                            | 2                                               | 1  |   | 2  | 1  | 1  | 2  | 1  |   |
| 13_1_40CM_4_Gemmatimonadetes_69_8            | 3  | 4                | 1                           | 1                                    | 1                                                              | 2                                                      | 2                                                | 2                                                       | 3                                          | 1                                            | 1                                        | 3                             | 2                             | 2                                                 | 2                                            | 3                                            | 2                                               | 1  |   | 2  | 1  | 2  | 4  | 2  |   |
| 13_1_40CM_Gemmatimonadetes_69_22_partial     | 3  | 2                | 1                           | 1                                    | 1                                                              | 1                                                      | 1                                                |                                                         | 1                                          | 1                                            | 1                                        | 1                             | 1                             | 1                                                 | 1                                            | 2                                            | 2                                               | 1  |   | 1  | 1  |    | 2  | 1  |   |
| 13_2_20CM_2_Gemmatimonadetes_69_23           | 2  | 4                | 1                           | 1                                    | 1                                                              | 1                                                      | 1                                                | 1                                                       | 1                                          | 2                                            | 1                                        | 3                             |                               | 2                                                 | 2                                            | 4                                            | 5                                               | 1  |   | 3  | 1  |    | 1  | 3  |   |
| 13_2_20CM_Gemmatimonadetes_69_27             | 2  | 2                | 1                           | 1                                    | 1                                                              | 1                                                      | 1                                                | 1                                                       | 2                                          | 1                                            | 1                                        | 1                             |                               | 2                                                 | 1                                            | 2                                            | 2                                               | 1  |   | 1  | 1  | 2  | 1  | 2  |   |
| 13_2_20CM_Gemmatimonadetes_69_8              | 3  | 1                | 1                           |                                      |                                                                | 1                                                      |                                                  | 1                                                       | 2                                          | 1                                            |                                          | 1                             | 1                             | 1                                                 | 1                                            | 2                                            | 2                                               | 1  |   | 1  |    |    | 2  | 2  |   |
| 13_2_20CM_Gemmatimonadetes_70_9              | 3  | 3                | 1                           | 1                                    | 1                                                              | 1                                                      | 1                                                |                                                         | 1                                          |                                              |                                          | 1                             | 1                             | 1                                                 | 1                                            | 1                                            | 2                                               | 1  |   | 1  | 1  | 2  | 1  | 1  |   |
| 13_1_20CM_2_Rokubacteria_68_19               | 4  | 1                |                             |                                      |                                                                |                                                        |                                                  |                                                         |                                            |                                              | 1                                        | 3                             |                               |                                                   | 3                                            | 1                                            |                                                 |    |   | 1  | 1  | 2  | 2  |    |   |
| 13_1_20CM_4_Rokubacteria_68_9                | 4  | 1                |                             |                                      |                                                                |                                                        | 1                                                | 1                                                       | 1                                          | 2                                            | 4                                        |                               |                               | 2                                                 | 3                                            | 4                                            | 2                                               | 2  | 1 | 1  | 3  | 3  | 2  | 1  |   |
| 13_1_20CM_4_Rokubacteria_70_14               |    | 2                |                             |                                      |                                                                |                                                        | 1                                                | 1                                                       | 2                                          | 1                                            | 4                                        |                               |                               |                                                   | 3                                            | 2                                            |                                                 |    | 1 | 1  | 1  | 2  | 3  |    |   |
| 13_1_40CM_2_Rokubacteria_68_13               | 4  | 1                |                             |                                      |                                                                |                                                        |                                                  |                                                         |                                            |                                              |                                          | 3                             |                               | 1                                                 | 2                                            | 2                                            |                                                 |    |   |    | 1  |    | 2  |    |   |
| 13_1_40CM_3_Rokubacteria_69_38               |    | 2                |                             |                                      |                                                                | 1                                                      | 1                                                | 1                                                       | 1                                          | 1                                            | 5                                        |                               |                               |                                                   | 3                                            | 2                                            |                                                 |    | 1 | 1  | 3  | 2  | 4  | 1  |   |
| 13_1_40CM_4_Rokubacteria_69_39               |    | 1                |                             |                                      |                                                                | 1                                                      | 1                                                | 1                                                       | 1                                          | 1                                            | 5                                        |                               |                               |                                                   | 3                                            | 3                                            |                                                 |    | 1 | 1  | 4  | 2  | 4  | 1  |   |
| 13_2_20CM_2_Rokubacteria_64_8                | 4  | 1                |                             |                                      |                                                                |                                                        | 1                                                | 1                                                       | 2                                          |                                              | 5                                        |                               |                               | 2                                                 | 3                                            | 4                                            |                                                 |    | 1 | 1  | 2  | 3  | 2  | 1  |   |
| 13_1_20CM_4_Alphaproteobacteria_65_11        |    |                  |                             |                                      |                                                                |                                                        |                                                  |                                                         |                                            |                                              | 1                                        |                               |                               |                                                   |                                              |                                              |                                                 |    |   |    |    |    |    |    |   |
| 13_1_20CM_2_Alphaproteobacteria_megabin_64_6 | 20 | 26               |                             |                                      |                                                                | 1                                                      | 8                                                | 3                                                       |                                            | 7                                            | 4                                        | 21                            |                               | 14                                                | 19                                           | 19                                           | 4                                               | 12 | 2 | 5  | 13 | 6  | 4  | 9  |   |
| 13_1_20CM_3_Alphaproteobacteria_megabin_62_7 | 10 | 5                |                             |                                      |                                                                |                                                        |                                                  | 4                                                       |                                            |                                              |                                          | 2                             | 4                             |                                                   | 1                                            | 3                                            | 4                                               |    | 1 | 1  |    |    | 1  | 2  | 1 |
| 13_1_20CM_3_Alphaproteobacteria_megabin_63_6 | 27 | 15               | 1                           |                                      | 1                                                              |                                                        | 6                                                | 11                                                      | 2                                          | 12                                           | 8                                        | 29                            | 1                             | 13                                                | 29                                           | 27                                           | 5                                               | 14 | 4 | 10 | 21 | 15 | 8  | 11 |   |
| 13_1_20CM_4_Alphaproteobacteria_megabin_64_7 | 27 | 30               |                             |                                      |                                                                |                                                        | 9                                                | 5                                                       | 1                                          | 9                                            | 8                                        | 25                            |                               | 14                                                | 34                                           | 33                                           | 7                                               | 10 | 1 | 11 | 18 | 13 | 8  | 15 |   |
| 13_1_20CM_Alphaproteobacteria_megabin_63_14  | 24 | 36               | 1                           |                                      | 1                                                              |                                                        | 7                                                | 10                                                      | 2                                          | 8                                            | 4                                        | 27                            |                               | 15                                                | 25                                           | 28                                           | 3                                               | 9  | 2 | 15 | 17 | 8  | 6  | 19 |   |
| 13_1_40CM_2_Alphaproteobacteria_megabin_64_4 | 13 | 26               | 3                           | 1                                    | 1                                                              |                                                        | 11                                               | 5                                                       |                                            | 5                                            | 4                                        | 24                            |                               | 17                                                | 17                                           | 23                                           | 13                                              | 11 | 1 | 8  | 15 | 5  | 7  | 9  |   |
| 13_1_40CM_3_Alphaproteobacteria_megabin_63_4 | 12 | 19               |                             | 1                                    | 1                                                              | 2                                                      | 7                                                | 4                                                       | 2                                          | 4                                            | 4                                        | 17                            |                               | 15                                                | 21                                           | 27                                           | 11                                              | 13 | 3 | 5  | 10 | 3  | 5  | 4  |   |
| 13_1_40CM_4_Alphaproteobacteria_megabin_63_4 | 10 | 21               |                             | 2                                    |                                                                | 1                                                      | 7                                                | 1                                                       |                                            | 4                                            | 1                                        | 26                            |                               | 19                                                | 11                                           | 21                                           | 14                                              | 11 | 1 | 7  | 8  | 2  | 4  | 6  |   |
| 13_2_20CM_2_Alphaproteobacteria_64_7         | 2  |                  |                             |                                      |                                                                |                                                        | 2                                                | 2                                                       |                                            | 2                                            |                                          | 1                             |                               |                                                   | 6                                            | 4                                            |                                                 | 3  | 1 | 1  | 3  | 1  |    | 1  |   |
| 13_1_20CM_2_Betaproteobacteria_megabin_64_7  | 13 | 9                |                             | 1                                    |                                                                |                                                        | 8                                                | 9                                                       | 8                                          | 7                                            | 4                                        | 24                            | 1                             | 16                                                | 8                                            | 16                                           | 20                                              | 1  | 3 | 6  | 10 | 7  | 3  | 14 |   |
| 13_1_20CM_3_Betaproteobacteria_63_8          |    |                  |                             |                                      |                                                                |                                                        |                                                  |                                                         |                                            |                                              |                                          | 1                             | 1                             | 2                                                 |                                              | 1                                            |                                                 |    |   |    |    | 1  |    |    |   |
| 13_1_20CM_3_Betaproteobacteria_megabin_65_6  | 5  | 14               |                             |                                      |                                                                |                                                        | 6                                                | 7                                                       | 1                                          | 10                                           | 2                                        | 18                            |                               | 11                                                | 5                                            | 22                                           | 6                                               |    | 2 | 8  | 17 | 17 | 7  | 11 |   |
| 13_1_20CM_3_Rhodocyclales_megabin_66_7       |    | 2                |                             |                                      |                                                                | 1                                                      |                                                  | 1                                                       | 1                                          |                                              |                                          |                               |                               | 4                                                 | 1                                            | 2                                            | 3                                               |    |   | 1  | 1  | 1  |    | 3  |   |
| 13_1_20CM_4_Betaproteobacteria_megabin_65_8  | 16 | 12               | 1                           |                                      | 1                                                              |                                                        | 7                                                | 8                                                       | 1                                          | 9                                            | 3                                        | 23                            | 3                             | 15                                                | 6                                            | 20                                           | 17                                              | 4  | 2 | 14 | 16 | 14 | 7  | 11 |   |
| 13_1_20CM_4_Delftia_acidovorans_67_18        |    | 2                |                             |                                      |                                                                |                                                        | 1                                                |                                                         | 3                                          | 1                                            | 11                                       |                               |                               | 1                                                 | 1                                            | 4                                            |                                                 |    |   | 2  | 7  | 1  | 1  | 3  |   |
| 13_1_20CM_Betaproteobacteria_67_22           |    |                  |                             |                                      |                                                                |                                                        |                                                  |                                                         |                                            |                                              |                                          |                               |                               |                                                   |                                              | 1                                            |                                                 |    |   |    |    |    |    |    |   |
| 13_1_20CM_Betaproteobacteria_megabin_64_11   | 7  | 6                |                             |                                      |                                                                |                                                        | 4                                                | 5                                                       | 1                                          | 4                                            | 5                                        | 9                             | 1                             | 3                                                 | 2                                            | 9                                            | 6                                               | 2  |   | 6  | 5  | 3  | 4  | 8  |   |
| 13_1_20CM_Betaproteobacteria_megabin_65_24   |    | 3                |                             |                                      |                                                                |                                                        | 3                                                | 2                                                       |                                            | 3                                            | 1                                        | 4                             |                               | 4                                                 |                                              | 4                                            | 6                                               | 1  | 1 | 5  | 6  | 4  | 4  | 7  |   |
| 13_1_40CM_2_Betaproteobacteria_megabin_64_4  | 10 | 8                |                             |                                      | 1                                                              |                                                        | 7                                                | 9                                                       | 3                                          | 5                                            | 5                                        | 26                            |                               | 16                                                | 9                                            | 31                                           | 19                                              | 7  | 3 | 13 | 16 | 10 | 11 | 13 |   |
| 13_1_40CM_3_Betaproteobacteria_megabin_64_4  | 15 | 12               | 1                           |                                      | 1                                                              |                                                        | 5                                                | 7                                                       | 7                                          | 12                                           | 6                                        | 21                            | 2                             | 14                                                | 4                                            | 23                                           | 16                                              | 1  | 3 | 19 | 19 | 5  | 9  | 15 |   |
| 13_1_40CM_4_Betaproteobacteria_64_4          |    |                  |                             |                                      |                                                                |                                                        |                                                  |                                                         |                                            | 2                                            |                                          | 1                             |                               |                                                   |                                              | 1                                            | 1                                               |    |   | 1  |    |    | 1  | 1  |   |
| 13_1_40CM_4_Betaproteobacteria_megabin_64_5  | 11 | 7                | 1                           |                                      | 1                                                              | 1                                                      | 8                                                | 7                                                       | 6                                          | 8                                            | 5                                        | 24                            |                               | 19                                                | 8                                            | 23                                           | 11                                              | 1  |   | 12 | 21 | 12 | 7  | 12 |   |
