# Supplementary material for: Proteogenomic analyses indicate bacterial methylotrophy and archaeal heterotrophy are prevalent below the grass root zone
Source: PubMed Central journal article supplement (PMC5103831; doi:10.7717/peerj.2687), 2016-11-08

**A**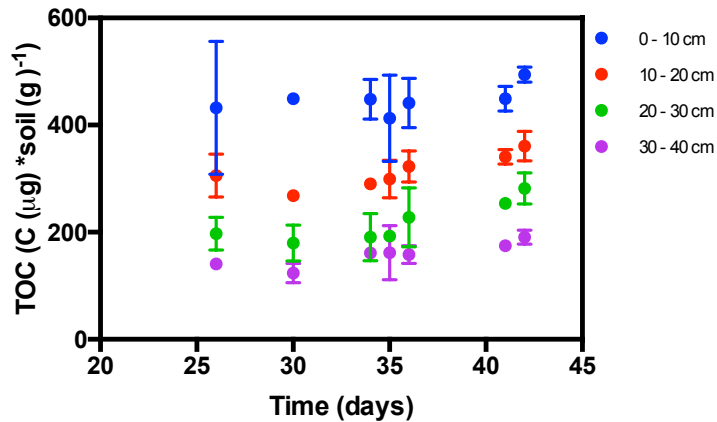**B**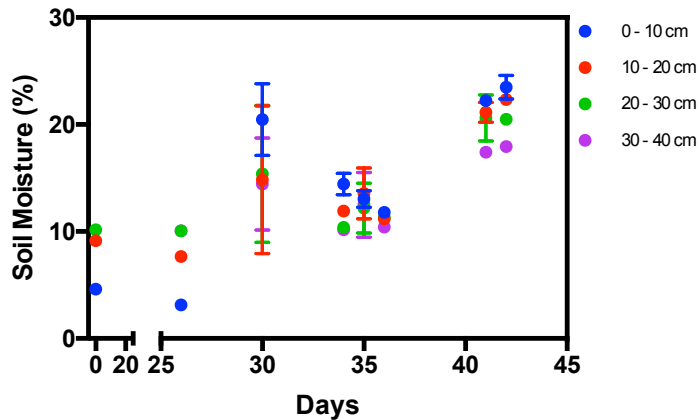**C**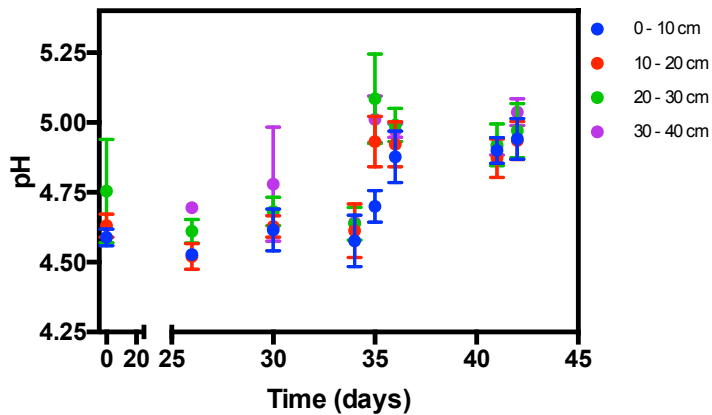**D**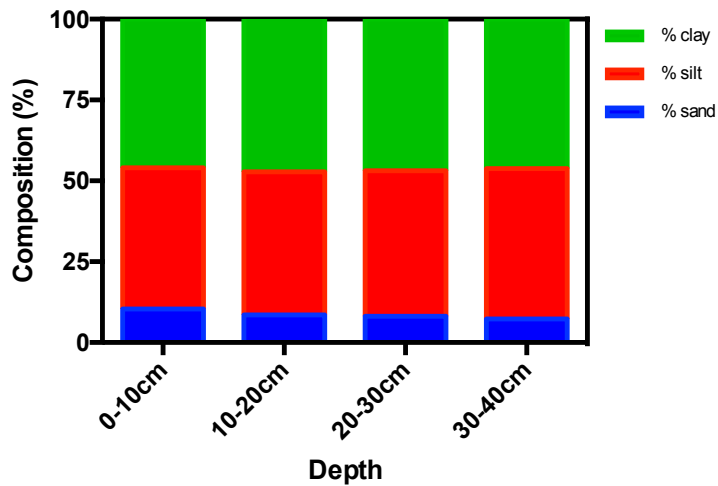

Supplement: peerj-04-2687-s001.pdf [file peerj-04-2687-s001.pdf]
