# Supplementary material for: Proteogenomic analyses indicate bacterial methylotrophy and archaeal heterotrophy are prevalent below the grass root zone
Source: PubMed Central journal article supplement (PMC5103831; doi:10.7717/peerj.2687), 2016-11-08
Supplement: peerj-04-2687-s007.pdf [file peerj-04-2687-s007.pdf]

## Pre-rain plot 1 10 - 20 cm

| Organism name                               | bin length | Partial to near |       | Bins/Meg | GC%   | coverage | # contigs | # features | longest contig | RP          |          | BSCG        |          | ASCG        |          | completo n status |
|---------------------------------------------|------------|-----------------|-------|----------|-------|----------|-----------|------------|----------------|-------------|----------|-------------|----------|-------------|----------|-------------------|
|                                             |            | complete        | abins |          |       |          |           |            |                | Inventory   | RP       | Inventory   | BSCG     | Inventory   | ASCG     |                   |
|                                             |            |                 |       |          |       |          |           |            |                | (total: 55) | multiple | (total: 51) | multiple | (total: 38) | multiple |                   |
| 13_1_20cm_UNK                               | 2.72E+08   |                 |       |          | 60.56 | 14.73    | 132399    | 383256     | 58324          | 54          | 53       | 51          | 51       | 38          |          | 38 megabin        |
| 13_1_20cm_virus_1                           | 4648       |                 |       |          | 42.62 | 67745.32 | 1         | 7          | 4648           | 0           | 0        | 0           | 0        | 0           |          | 0 partial         |
| 13_1_20CM_Alphaproteobacteria_megabin_63_14 | 38528272   |                 |       |          | 62.83 | 13.9     | 20676     | 51307      | 21416          | 53          | 52       | 51          | 51       | 13          |          | 12 megabin        |
| 13_1_20CM_Chloroflexi_megabin_53_42         | 4859784    |                 |       |          | 53.05 | 42.11    | 2203      | 5680       | 8307           | 39          | 13       | 37          | 17       | 13          |          | 8 partial         |
| 13_1_20CM_Chloroflexi_megabin_67_15         | 11414150   |                 |       |          | 67.09 | 15.55    | 6586      | 14173      | 10021          | 34          | 22       | 40          | 28       | 12          |          | 8 partial         |
| 13_1_20CM_Chloroflexi_megabin_53_13         | 25232114   |                 |       |          | 52.74 | 13.29    | 13569     | 31767      | 24402          | 51          | 50       | 47          | 44       | 15          |          | 14 megabin        |
| 13_1_20CM_Gemmatimonadetes_megabin_68_21    | 14062384   |                 |       |          | 67.75 | 22.04    | 6294      | 17231      | 49383          | 53          | 52       | 50          | 49       | 15          |          | 13 megabin        |
| 13_1_20CM_Verrucomicrobia_megabin_56_12     | 17936976   |                 |       |          | 55.91 | 12.87    | 9427      | 23553      | 18202          | 50          | 50       | 50          | 49       | 15          |          | 14 megabin        |
| 13_1_20CM_Acidobacteria_megabin_56_12       | 27798107   |                 |       |          | 55.91 | 12.77    | 14189     | 33235      | 25502          | 53          | 53       | 51          | 51       | 16          |          | 16 megabin        |
| 13_1_20CM_Acidobacteria_megabin_65_14       | 7795168    |                 |       |          | 64.66 | 13.55    | 4266      | 9223       | 15279          | 51          | 48       | 49          | 44       | 14          |          | 7 megabin         |
| 13_1_20CM_Methyloirabilis_megabin_70_15     | 15032576   |                 |       |          | 69.77 | 14.86    | 6709      | 20690      | 18460          | 52          | 49       | 51          | 47       | 15          |          | 14 megabin        |
| 13_1_20CM_Actinobacteria_megabin_69_28      | 9458937    |                 |       |          | 68.9  | 27.49    | 4939      | 12358      | 13300          | 52          | 52       | 51          | 50       | 16          |          | 14 megabin        |
| 13_1_20CM_Actinobacteria_megabin_70_12      | 71381526   |                 |       |          | 69.65 | 12.41    | 37007     | 98427      | 28278          | 52          | 52       | 51          | 51       | 18          |          | 17 megabin        |
| 13_1_20CM_Deltaproteobacteria_megabin_68_15 | 17161323   |                 |       |          | 68.06 | 14.96    | 9128      | 21728      | 17333          | 51          | 51       | 49          | 48       | 14          |          | 12 megabin        |
| 13_1_20CM_Betaproteobacteria_megabin_65_20  | 6515059    |                 |       |          | 65.28 | 23.55    | 5280      | 8346       | 18745          | 51          | 46       | 51          | 48       | 15          |          | 12 megabin        |
| 13_1_20CM_Betaproteobacteria_megabin_64_11  | 13286508   |                 |       |          | 63.93 | 11.15    | 7171      | 17909      | 20689          | 50          | 45       | 50          | 44       | 16          |          | 12 megabin        |
| 13_1_20CM_Gemmatimonadetes_69_28            | 2375461    | 2375461         |       |          | 68.84 | 28.09    | 154       | 2332       | 41155          | 9           | 1        | 9           | 1        | 4           |          | 1 partial         |
| 13_1_20CM_Chloroflexi_66_33                 | 793227     | 793227          |       |          | 66.32 | 33.26    | 64        | 815        | 37216          | 24          | 0        | 12          | 0        | 2           |          | 0 partial         |
| 13_1_20CM_Archaea_52_20                     | 762164     | 762164          |       |          | 52.18 | 20.25    | 69        | 801        | 28724          | 17          | 2        | 4           | 0        | 16          |          | 0 partial         |
| 13_1_20CM_Methyloirabilis_70_15             | 912272     | 912272          |       |          | 69.59 | 15.42    | 84        | 1004       | 22951          | 4           | 0        | 2           | 0        | 0           |          | 0 partial         |
| 13_1_20CM_Chloroflexi_54_36                 | 1338217    | 1338217         |       |          | 54.37 | 36.24    | 117       | 1349       | 30171          | 24          | 0        | 22          | 0        | 2           |          | 0 partial         |
| 13_1_20CM_Chloroflexi_50_12                 | 540597     | 540597          |       |          | 49.94 | 11.85    | 49        | 616        | 51310          | 21          | 0        | 16          | 0        | 1           |          | 0 partial         |
| 13_1_20CM_Betaproteobacteria_67_22          | 169873     | 169873          |       |          | 67.09 | 22.32    | 18        | 194        | 13809          | 18          | 1        | 19          | 0        | 1           |          | 0 partial         |
| 13_1_20CM_Acidobacteria_58_21               | 3920195    | 3920195         |       |          | 57.88 | 20.66    | 240       | 3510       | 51722          | 33          | 0        | 31          | 1        | 9           |          | 1 partial         |
| 13_1_20CM_Verrucomicrobia_54_28             | 2281644    | 2281644         |       |          | 54.14 | 28.07    | 119       | 2181       | 48122          | 42          | 1        | 37          | 0        | 8           |          | 0 partial         |
| 13_1_20CM_Gemmatimonadetes_66_74_partial    | 53692      |                 |       |          | 66.33 | 75.08    | 25        | 62         | 9386           | 16          | 1        | 15          | 0        | 2           |          | 0 partial         |
| 13_1_20CM_Gemmatimonadetes_69_60_partial    | 120514     |                 |       |          | 68.75 | 59.33    | 70        | 161        | 10017          | 18          | 0        | 18          | 0        | 2           |          | 0 partial         |
| 13_1_20CM_Gemmatimonadetes_69_52_partial    | 202485     |                 |       |          | 69    | 52.54    | 95        | 273        | 13883          | 18          | 0        | 19          | 2        | 1           |          | 1 partial         |
| Sum                                         | 5.66E+08   | 13093650        |       | 2%       |       |          |           |            |                |             |          |             |          |             |          |                   |
| Count                                       | 28         | 9               |       | 32%      |       |          |           |            |                |             |          |             |          |             |          |                   |

## Four days after first rain plot 1 10 - 20 cm

| Organism name                                     | bin length | Partial to near |       | Bins/Meg | GC%   | coverage | # contigs | # features | longest contig | RP          |          | BSCG        |          | ASCG        |          | completo n status |
|---------------------------------------------------|------------|-----------------|-------|----------|-------|----------|-----------|------------|----------------|-------------|----------|-------------|----------|-------------|----------|-------------------|
|                                                   |            | complete        | abins |          |       |          |           |            |                | Inventory   | RP       | Inventory   | BSCG     | Inventory   | ASCG     |                   |
|                                                   |            |                 |       |          |       |          |           |            |                | (total: 55) | multiple | (total: 51) | multiple | (total: 38) | multiple |                   |
| 13_1_20CM_2_UNK                                   | 3.02E+08   |                 |       |          | 62.48 | 9.24     | 129447    | 419029     | 101778         | 54          | 53       | 51          | 51       | 38          |          | 35 megabin        |
| 13_1_20CM_2_Archaea_Thermoplasmatales_64_100      | 253661     |                 |       |          | 64.17 | 91.68    | 95        | 349        | 16827          | 22          | 1        | 6           | 0        | 21          |          | 1 partial         |
| 13_1_20CM_2_Thaumarchaeota_39_11                  | 451093     |                 |       |          | 39.35 | 18.63    | 134       | 606        | 7908           | 3           | 0        | 1           | 0        | 15          |          | 3 partial         |
| 13_1_20CM_2_Thaumarchaeota_38_5                   | 442543     |                 |       |          | 37.95 | 8.59     | 144       | 577        | 7895           | 2           | 0        | 0           | 0        | 11          |          | 3 partial         |
| 13_1_20CM_2_Gemmatimonadetes-rel_maybe_71-24_part | 964988     |                 |       |          | 70.54 | 41.03    | 307       | 1320       | 15349          | 8           | 1        | 7           | 1        | 3           |          | 0 partial         |
| 13_1_20CM_2_Novel_55_9                            | 1736449    |                 |       |          | 54.67 | 15.67    | 452       | 2153       | 16489          | 13          | 2        | 4           | 0        | 2           |          | 0 partial         |
| 13_1_20CM_2_Deltaproteobacteria_megabin_68_13     | 1862494    |                 |       |          | 68.13 | 21.42    | 737       | 2125       | 14005          | 20          | 2        | 19          | 2        | 7           |          | 3 partial         |
| 13_1_20CM_2_Archaea_51_12                         | 3289518    |                 |       |          | 51.61 | 20.05    | 483       | 3973       | 61193          | 10          | 0        | 5           | 2        | 12          |          | 3 partial         |
| 13_1_20CM_2_Archaea_MCG_51_8                      | 3613112    |                 |       |          | 51.58 | 13.71    | 944       | 4711       | 71911          | 9           | 2        | 4           | 1        | 11          |          | 4 partial         |
| 13_1_20CM_2_Deltaproteobacteria_megabin_68_7      | 19570670   |                 |       |          | 67.95 | 7.46     | 11702     | 24471      | 17114          | 49          | 44       | 48          | 43       | 13          |          | 12 megabin        |
| 13_1_20CM_2_Deltaproteobacteria_megabin_56_5      | 7146664    |                 |       |          | 55.8  | 5.44     | 4267      | 8477       | 20081          | 42          | 33       | 44          | 35       | 11          |          | 7 megabin         |
| 13_1_20CM_2_Alphaproteobacteria_megabin_64_6      | 25684884   |                 |       |          | 64.28 | 6.97     | 15877     | 34007      | 18020          | 47          | 39       | 45          | 37       | 13          |          | 9 megabin         |
| 13_1_20CM_2_Betaproteobacteria_megabin_64_7       | 22582789   |                 |       |          | 64.26 | 7.33     | 13565     | 30524      | 17643          | 52          | 51       | 51          | 51       | 15          |          | 14 megabin        |
| 13_1_20CM_2_Gammaproteobacteria_megabin_63_6      | 13185561   |                 |       |          | 62.88 | 6.65     | 8426      | 16126      | 11871          | 15          | 5        | 15          | 9        | 7           |          | 3 partial         |
| 13_1_20CM_2_Proteobacteria_megabin_65_9           | 21830755   |                 |       |          | 64.88 | 9.44     | 7672      | 30925      | 41238          | 42          | 21       | 34          | 19       | 11          |          | 6 partial         |
| 13_1_20CM_2_Gemmatimonadetes_megabin_67_6         | 8316215    |                 |       |          | 67.1  | 7.03     | 4159      | 10294      | 36460          | 52          | 48       | 49          | 49       | 13          |          | 12 megabin        |
| 13_1_20CM_2_Actinobacteria_megabin_66_6           | 32885460   |                 |       |          | 66.32 | 6.41     | 20276     | 44293      | 19608          | 51          | 51       | 51          | 51       | 17          |          | 14 megabin        |
| 13_1_20CM_2_Gemmatimonadetes_megabin_69_23        | 8618661    |                 |       |          | 68.97 | 20.82    | 2879      | 10148      | 47444          | 53          | 51       | 51          | 50       | 13          |          | 12 megabin        |
| 13_1_20CM_2_Acidobacteria_megabin_59_6            | 39710864   |                 |       |          | 58.63 | 6.83     | 21029     | 45978      | 31137          | 53          | 52       | 51          | 51       | 15          |          | 15 megabin        |
| 13_1_20CM_2_Firmicutes_megabin_67_9               | 13692972   |                 |       |          | 67.34 | 9        | 8201      | 18110      | 21641          | 52          | 52       | 50          | 50       | 19          |          | 14 megabin        |
| 13_1_20CM_2_Chloroflexi_megabin_67_8              | 13116783   |                 |       |          | 66.97 | 7.99     | 7607      | 16268      | 36828          | 40          | 18       | 39          | 19       | 12          |          | 11 partial        |
| 13_1_20CM_2_Nitrospirae_megabin_62_12             | 1607493    |                 |       |          | 63.25 | 32.08    | 835       | 2241       | 8463           | 39          | 21       | 39          | 17       | 7           |          | 3 partial         |
| 13_1_20CM_2_Verrucomicrobia_megabin_58_5          | 15474218   |                 |       |          | 58.18 | 5.1      | 8958      | 19382      | 12700          | 51          | 50       | 49          | 49       | 15          |          | 15 megabin        |
| 13_1_20CM_2_Firmicutes_megabin_55_6               | 4924225    |                 |       |          | 55.07 | 6.28     | 3140      | 6001       | 7828           | 33          | 11       | 32          | 14       | 9           |          | 6 partial         |
| 13_1_20CM_2_Chloroflexi_megabin_53_5              | 7640243    |                 |       |          | 53.21 | 4.65     | 4855      | 9943       | 14029          | 40          | 22       | 37          | 24       | 13          |          | 7 partial         |
| 13_1_20CM_2_Archaea_megabin_64_15                 | 14674057   |                 |       |          | 63.83 | 15.73    | 7458      | 19308      | 22411          | 41          | 38       | 29          | 25       | 38          |          | 38 megabin        |
| 13_1_20CM_2_Archaea_megabin_51_10                 | 20834786   |                 |       |          | 50.75 | 10.15    | 7736      | 25500      | 107600         | 41          | 38       | 29          | 25       | 38          |          | 38 megabin        |
| 13_1_20CM_2_Nitrospirae_megabin_63_13             | 1373296    |                 |       |          | 62.17 | 12.99    | 553       | 1666       | 27881          | 30          | 4        | 32          | 5        | 4           |          | 0 partial         |
| 13_1_20CM_2_Nitrospirae_megabin_61_5              | 3714973    |                 |       |          | 60.51 | 5.11     | 2277      | 4789       | 8299           | 31          | 3        | 35          | 8        | 9           |          | 5 partial         |
| 13_1_20CM_2_Novel_70_7                            | 2175604    | 2175604         |       |          | 69.35 | 6.75     | 165       | 2380       | 40659          | 17          | 1        | 11          | 0        | 7           |          | 1 partial         |
| 13_1_20CM_2_Rokubacteria_69_58                    | 2617030    | 2617030         |       |          | 69.97 | 58.53    | 375       | 2987       | 41392          | 46          | 1        | 46          | 3        | 11          |          | 1 near            |
| 13_1_20CM_2_Novel_70_9                            | 1564845    | 1564845         |       |          | 70.3  | 8.54     | 109       | 1677       | 59505          | 28          | 0        | 31          | 0        | 10          |          | 0 partial         |
| 13_1_20CM_2_Novel_68_14                           | 2223188    | 2223188         |       |          | 67.98 | 13.83    | 141       | 2098       | 82545          | 15          | 0        | 15          | 1        | 7           |          | 0 partial         |
| 13_1_20CM_2_Deltaproteobacteria_69_21             | 2852113    | 2852113         |       |          | 68.46 | 21.21    | 187       | 2899       | 41229          | 30          | 1        | 29          | 3        | 6           |          | 0 partial         |
| 13_1_20CM_2_Actinobacteria_66_18                  | 1426442    | 1426442         |       |          | 65.94 | 18.13    | 104       | 1516       | 42156          | 19          | 0        | 19          | 0        | 4           |          | 0 partial         |
| 13_1_20CM_2_Novel_65_9                            | 4585906    | 4585906         |       |          | 64.87 | 9.32     | 313       | 4177       | 41922          | 13          | 1        | 12          | 0        | 7           |          | 0 partial         |
| 13_1_20CM_2_Actinobacteria_65_11                  | 2460926    | 2460926         |       |          | 65.31 | 11       | 96        | 2608       | 97298          | 17          | 1        | 18          | 0        | 9           |          | 0 partial         |
| 13_1_20CM_2_Acidobacteria_60_10                   | 2172905    | 2172905         |       |          | 60.02 | 10.09    | 166       | 2006       | 32164          | 32          | 0        | 36          | 0        | 10          |          | 1 partial         |
| 13_1_20CM_2_Acidobacteria_55_15                   | 3487967    | 3487967         |       |          | 55.45 | 15.48    | 211       | 3457       | 61806          | 45          | 0        | 46          | 0        | 14          |          | 0 near            |
| 13_1_20CM_2_Novel_68_7                            | 1665476    | 1665476         |       |          | 67.93 | 6.77     | 137       | 1544       | 30448          | 12          | 1        | 11          | 0        | 4           |          | 1 partial         |
| 13_1_20CM_2_Gemmatimonadetes_70_10                | 1584817    | 1584817         |       |          | 70.04 | 10.12    | 98        | 1619       | 49180          | 20          | 0        | 22          | 3        | 8           |          | 0 partial         |
| 13_1_20CM_2_Nitrospirae_62_14                     | 1028956    | 1028956         |       |          | 62.21 | 13.96    | 174       | 1053       | 41113          | 11          | 0        | 10          | 0        | 8           |          | 0 partial         |
| 13_1_20CM_2_Acidobacteria_57_8                    | 1112052    | 1112052         |       |          | 56.53 | 7.59     | 105       | 1135       | 21774          | 21          | 0        | 20          | 0        | 5           |          | 0 partial         |
| 13_1_20CM_2_Chloroflexi_59_7                      | 1808416    | 1808416         |       |          | 58.68 | 6.63     | 154       | 1800       | 27929          | 34          | 3        | 31          | 2        | 7           |          | 1 partial         |
| 13_1_20CM_2_Rokubacteria_68_19                    | 2818324    | 2818324         |       |          | 68.3  | 19.24    | 186       | 3054       | 56673          | 22          | 1        | 26          | 1        | 11          |          | 0 partial         |
| 13_1_20CM_2_Archaea_megabin_38_9                  | 1136162    | 1136162         |       |          | 37.8  | 9.26     | 68        | 1347       | 52505          | 30          | 2        | 12          | 0        | 25          |          | 1 partial         |
| 13_1_20CM_2_Archaea_SAGMCG_39_20                  | 1067158    | 1067158         |       |          | 39.02 | 19.75    | 61        | 1255       | 62635          | 30          | 1        | 9           | 1        | 18          |          | 0 partial         |
| 13_1_20CM_2_Archaea_MCG_53_14                     | 1549201    | 1549201         |       |          |       |          |           |            |                |             |          |             |          |             |          |                   |

| Organism name                                 | bin length | Partial to | Bins/Meg | GC% | coverage | # contigs | # features | RP          |          | BSCG        |          | ASCG        |          | completo | n status   |
|-----------------------------------------------|------------|------------|----------|-----|----------|-----------|------------|-------------|----------|-------------|----------|-------------|----------|----------|------------|
|                                               |            | near       |          |     |          |           |            | Inventory   | RP       | Inventory   | BSCG     | Inventory   | ASCG     |          |            |
|                                               |            | complete   | abins    |     |          |           | longest    | (total: 55) | multiple | (total: 51) | multiple | (total: 38) | multiple |          |            |
| 13_1_20cm_3_UNK                               | 2.4E+08    |            |          |     | 61.31    | 7.11      | 101274     | 335013      | 118830   | 55          | 53       | 51          | 51       | 25       | 19 megabin |
| 13_1_20CM_3_Gemmatimonas_aurantiaca_60_15     | 897127     |            |          |     | 60.28    | 14.51     | 298        | 1066        | 7995     | 35          | 1        | 30          | 0        | 8        | 2 partial  |
| 13_1_20CM_3_Alphaproteobacteria_megabin_62_7  | 5391795    |            |          |     | 61.82    | 7.6       | 2026       | 7983        | 9288     | 41          | 30       | 33          | 13       | 10       | 7 partial  |
| 13_1_20CM_3_Rhodocyclales_megabin_66_7        | 2155558    |            |          |     | 65.94    | 7.37      | 1199       | 2932        | 12318    | 40          | 16       | 35          | 14       | 8        | 3 partial  |
| 13_1_20CM_3_Actinobacteridae_megabin_60_6     | 68596191   |            |          |     | 69.03    | 6.76      | 35763      | 92249       | 25710    | 52          | 52       | 51          | 51       | 18       | 17 megabin |
| 13_1_20CM_3_Alphaproteobacteria_megabin_63_6  | 38116484   |            |          |     | 63.32    | 6.71      | 22501      | 50498       | 15190    | 53          | 53       | 51          | 51       | 15       | 13 megabin |
| 13_1_20CM_3_Actinobacteria_megabin_70_7       | 45061265   |            |          |     | 70.04    | 7.59      | 21646      | 63851       | 53340    | 52          | 52       | 51          | 51       | 18       | 17 megabin |
| 13_1_20CM_3_Betaproteobacteria_megabin_65_6   | 20205575   |            |          |     | 64.94    | 6.92      | 10750      | 27317       | 21724    | 52          | 48       | 50          | 44       | 16       | 14 megabin |
| 13_1_20CM_3_Deltaproteobacteria_megabin_65_6  | 21447536   |            |          |     | 65.15    | 6.51      | 11976      | 26344       | 22151    | 53          | 49       | 51          | 46       | 14       | 11 megabin |
| 13_1_20CM_3_Fungi_48_4                        | 18107678   |            |          |     | 47.69    | 4.47      | 8966       | 20345       | 23198    | 30          | 10       | 5           | 2        | 17       | 10 partial |
| 13_1_20CM_3_Chloroflexi_megabin_53_7          | 15700182   |            |          |     | 52.95    | 7.51      | 8195       | 19393       | 8177     | 52          | 48       | 45          | 41       | 14       | 12 megabin |
| 13_1_20CM_3_Verrucomicrobia_megabin_56_15     | 2068733    |            |          |     | 56.01    | 14.56     | 767        | 2460        | 8730     | 44          | 26       | 35          | 17       | 13       | 5 partial  |
| 13_1_20CM_3_Acidobacteria_megabin_58_5        | 35100898   |            |          |     | 58.25    | 5.43      | 19828      | 43199       | 11581    | 53          | 53       | 51          | 49       | 17       | 15 megabin |
| 13_1_20CM_3_Verrucomicrobia_megabin_57_6      | 32748512   |            |          |     | 56.74    | 5.95      | 16770      | 42189       | 21688    | 51          | 51       | 50          | 49       | 17       | 17 megabin |
| 13_1_20CM_3_Proteobacteria_megabin_63_7       | 24206792   |            |          |     | 63.57    | 7.49      | 11427      | 32626       | 39168    | 36          | 29       | 33          | 23       | 12       | 10 partial |
| 13_1_20CM_3_Gemmatimonadetes_megabin_65_8     | 17202658   |            |          |     | 64.7     | 7.94      | 7254       | 21168       | 38437    | 53          | 53       | 51          | 51       | 16       | 15 megabin |
| 13_1_20CM_3_Chloroflexi_megabin_68_7          | 17201551   |            |          |     | 67.52    | 7.06      | 9527       | 21527       | 16209    | 49          | 45       | 48          | 46       | 14       | 10 megabin |
| 13_1_20CM_3_Firmicutes_megabin_68_7           | 8490665    |            |          |     | 67.41    | 7.33      | 5095       | 11160       | 22014    | 50          | 48       | 50          | 47       | 14       | 10 megabin |
| 13_1_20CM_3_Methylomirabilis_megabin_69_6     | 8575535    |            |          |     | 69.06    | 6.55      | 4432       | 11774       | 13509    | 46          | 43       | 43          | 37       | 12       | 9 megabin  |
| 13_1_20CM_3_Cyanobacteria_megabin_60_6        | 10051784   |            |          |     | 60.02    | 5.88      | 6146       | 11385       | 34186    | 4           | 2        | 4           | 0        | 4        | 1 partial  |
| 13_1_20CM_3_Bacteroidetes_megabin_54_5        | 9600510    |            |          |     | 54.08    | 5.43      | 5714       | 11243       | 10736    | 39          | 13       | 34          | 8        | 11       | 5 partial  |
| 13_1_20CM_3_Archaea_megabin_66_7              | 2790111    |            |          |     | 65.21    | 7.54      | 1594       | 3711        | 12970    | 32          | 24       | 15          | 8        | 34       | 20 megabin |
| 13_1_20CM_3_Archaea_megabin_53_6              | 1513093    |            |          |     | 52.45    | 5.93      | 761        | 1897        | 13374    | 30          | 11       | 9           | 1        | 35       | 9 megabin  |
| 13_1_20CM_3_Archaea_megabin_36_3              | 1143233    |            |          |     | 36.23    | 3.26      | 779        | 1590        | 4664     | 16          | 3        | 3           | 1        | 17       | 7 partial  |
| 13_1_20CM_3_Actinobacteria_68_10              | 1191042    | 1191042    |          |     | 67.88    | 10.36     | 98         | 1325        | 26599    | 7           | 0        | 7           | 0        | 7        | 0 partial  |
| 13_1_20CM_3_Actinobacteria_71_11              | 6222268    | 6222268    |          |     | 71.18    | 11.36     | 444        | 6432        | 49005    | 42          | 4        | 35          | 4        | 12       | 5 partial  |
| 13_1_20CM_3_Chloroflexi_54_15                 | 3194828    |            |          |     | 53.56    | 14.5      | 259        | 3112        | 30397    | 32          | 0        | 29          | 2        | 8        | 2 partial  |
| 13_1_20CM_3_Acidobacteria_58_11               | 2802244    | 2802244    |          |     | 58.54    | 11.42     | 199        | 2620        | 43135    | 16          | 2        | 12          | 0        | 5        | 0 partial  |
| CONTAMINANT_13_1_20CM_3_Alphaproteobacteria_6 |            |            |          |     |          |           |            |             |          |             |          |             |          |          |            |
| 4_12                                          | 1874975    | 1874975    |          |     | 64.11    | 11.6      | 162        | 1975        | 27149    | 33          | 1        | 28          | 0        | 5        | 0 partial  |
| 13_1_20CM_3_Actinobacteria_68_9               | 2365548    | 2365548    |          |     | 68.89    | 8.68      | 152        | 2555        | 65518    | 46          | 1        | 46          | 1        | 9        | 1 near     |
| 13_1_20CM_3_Actinobacteria_70_7               | 5807638    | 5807638    |          |     | 69.84    | 6.89      | 415        | 5747        | 48528    | 36          | 5        | 31          | 3        | 8        | 2 partial  |
| 13_1_20CM_3_Betaproteobacteria_63_8           | 1956095    | 1956095    |          |     | 62.6     | 7.85      | 167        | 2069        | 27067    | 36          | 3        | 34          | 3        | 7        | 2 partial  |
| 13_1_20CM_3_Acidobacteria_53_8                | 6121216    | 6121216    |          |     | 52.84    | 8.55      | 155        | 5562        | 252073   | 48          | 1        | 48          | 0        | 14       | 1 near     |
| 13_1_20CM_3_Verrucomicrobia_54_17             | 2455393    | 2455393    |          |     | 54.18    | 16.89     | 143        | 2436        | 67045    | 40          | 1        | 35          | 0        | 10       | 0 partial  |
| Sum                                           | 6.8E+08    | 30796419   |          | 5%  |          |           |            |             |          |             |          |             |          |          |            |
| Count                                         |            | 34         | 9        | 26% |          |           |            |             |          |             |          |             |          |          |            |

2 days after second rain plot 1 10 - 20 cm

| Organism name                                | bin length | Partial to | Bins/Meg | GC% | coverage | # contigs | # features | RP          |          | BSCG        |          | ASCG        |          | completo | n status   |
|----------------------------------------------|------------|------------|----------|-----|----------|-----------|------------|-------------|----------|-------------|----------|-------------|----------|----------|------------|
|                                              |            | near       |          |     |          |           |            | Inventory   | RP       | Inventory   | BSCG     | Inventory   | ASCG     |          |            |
|                                              |            | complete   | abins    |     |          |           | longest    | (total: 55) | multiple | (total: 51) | multiple | (total: 38) | multiple |          |            |
| 13_1_20cm_4_UNK                              | 1.85E+08   |            |          |     | 63       | 7.77      | 80947      | 265900      | 97665    | 53          | 53       | 51          | 51       | 30       | 22 megabin |
| 13_1_20CM_4_Delftia_acidovorans_67_18        | 6412626    |            |          |     | 66.65    | 29.66     | 53         | 5784        | 538623   | 52          | 1        | 51          | 0        | 13       | 0 near     |
| 13_1_20CM_4_Ktedonobacteria_53_7             | 1539877    |            |          |     | 52.68    | 11.32     | 448        | 1651        | 8036     | 10          | 0        | 9           | 0        | 4        | 0 partial  |
| 13_1_20CM_4_Rokubacteria_70_13               | 650906     |            |          |     | 70.38    | 13.21     | 256        | 814         | 12613    | 22          | 3        | 25          | 3        | 4        | 2 partial  |
| 13_1_20CM_4_GAL15_megabin_65_7               | 2394148    |            |          |     | 65.04    | 6.52      | 837        | 2904        | 17102    | 47          | 12       | 44          | 15       | 10       | 8 megabin  |
| 13_1_20CM_4_Nitrospirae_megabin_61_6         | 6128098    |            |          |     | 60.64    | 6.51      | 2509       | 7580        | 19329    | 46          | 38       | 47          | 38       | 14       | 11 megabin |
| 13_1_20CM_4_Alphaproteobacteria_megabin_64_7 | 36316066   |            |          |     | 63.59    | 7.19      | 21492      | 48762       | 18319    | 53          | 52       | 51          | 49       | 11       | 11 megabin |
| 13_1_20CM_4_Actinobacteria_megabin_69_7      | 59267558   |            |          |     | 69.03    | 6.86      | 33556      | 81766       | 19964    | 53          | 51       | 51          | 51       | 17       | 17 megabin |
| 13_1_20CM_4_Euryarchaeota_megabin_65_10      | 4239442    |            |          |     | 64.58    | 10.95     | 2173       | 5487        | 36829    | 37          | 30       | 21          | 14       | 38       | 32 megabin |
| 13_1_20CM_4_Euryarchaeota_52_7               | 1565737    |            |          |     | 52.36    | 7.57      | 883        | 1897        | 18873    | 22          | 12       | 7           | 3        | 21       | 16 partial |
| 13_1_20CM_4_Archaea_megabin_64_10            | 1174542    |            |          |     | 63.57    | 10.5      | 535        | 1488        | 43329    | 4           | 0        | 4           | 1        | 13       | 4 partial  |
| 13_1_20CM_4_Archaea_megabin_52_8             | 3748098    |            |          |     | 51.85    | 8.1       | 1490       | 4742        | 24296    | 36          | 31       | 16          | 11       | 36       | 32 megabin |
| 13_1_20CM_4_Archaea_megabin_37_4             | 1442506    |            |          |     | 36.21    | 4.82      | 603        | 2057        | 24383    | 31          | 5        | 12          | 6        | 37       | 12 megabin |
| 13_1_20CM_4_Deltaproteobacteria_megabin_68_7 | 19760215   |            |          |     | 68.48    | 8         | 9844       | 24206       | 36640    | 52          | 49       | 50          | 47       | 17       | 13 megabin |
| 13_1_20CM_4_Betaproteobacteria_megabin_65_8  | 21891023   |            |          |     | 64.82    | 8.29      | 12916      | 29846       | 23303    | 52          | 51       | 51          | 50       | 15       | 13 megabin |
| 13_1_20CM_4_Acidobacteria_megabin_58_6       | 45609096   |            |          |     | 57.85    | 6.17      | 25146      | 55572       | 17558    | 53          | 53       | 51          | 51       | 16       | 15 megabin |
| 13_1_20CM_4_Proteobacteria_megabin_63_8      | 29093346   |            |          |     | 63.03    | 7.86      | 14972      | 38684       | 41144    | 44          | 32       | 43          | 37       | 17       | 14 megabin |
| 13_1_20CM_4_Gemmatimonadetes_megabin_67_9    | 17470607   |            |          |     | 66.68    | 9.15      | 8084       | 21615       | 37703    | 53          | 53       | 51          | 50       | 16       | 14 megabin |
| 13_1_20CM_4_Methylomirabilis_megabin_69_7    | 17403923   |            |          |     | 69.5     | 7.65      | 7910       | 23267       | 33658    | 51          | 50       | 50          | 48       | 14       | 13 megabin |
| 13_1_20CM_4_Verrucomicrobia_megabin_57_6     | 20520797   |            |          |     | 56.67    | 6.27      | 11859      | 26742       | 14913    | 51          | 50       | 50          | 49       | 16       | 15 megabin |
| 13_1_20CM_4_Chloroflexi_megabin_62_6         | 21422472   |            |          |     | 62.39    | 6.61      | 12661      | 27092       | 12562    | 49          | 48       | 50          | 49       | 14       | 12 megabin |
| 13_1_20CM_4_Firmicutes_megabin_64_7          | 9992075    |            |          |     | 64.26    | 7.32      | 6345       | 13076       | 13274    | 50          | 44       | 49          | 46       | 16       | 12 megabin |
| 13_1_20CM_4_Bacteroidetes_60_6               | 5944011    |            |          |     | 60.62    | 6.87      | 3728       | 6853        | 25239    | 12          | 1        | 11          | 2        | 5        | 1 partial  |
| 13_1_20CM_4_Cyanobacteria_61_6               | 5758731    |            |          |     | 60.73    | 6.14      | 3730       | 6540        | 9277     | 6           | 2        | 5           | 1        | 2        | 1 partial  |
| 13_1_20CM_4_Rokubacteria_megabin_66_7        | 4198491    |            |          |     | 66.63    | 7.2       | 2477       | 5355        | 10572    | 13          | 7        | 16          | 9        | 8        | 3 partial  |
| 13_1_20CM_4_Fungi_44_6                       | 3006783    |            |          |     | 41.91    | 6.32      | 1892       | 3569        | 18980    | 5           | 1        | 1           | 0        | 4        | 2 partial  |
| 13_1_20CM_4_virus_53_5                       | 17017      |            |          |     | 51.89    | 4.17      | 12         | 20          | 2309     | 0           | 0        | 0           | 0        | 0        | 0 partial  |
| 13_1_20CM_4_Gemmatimonadetes_69_16           | 2835016    | 2835016    |          |     | 69.13    | 15.82     | 88         | 2736        | 162773   | 30          | 1        | 26          | 0        | 10       | 0 partial  |
| 13_1_20CM_4_Rokubacteria_68_9                | 4240272    | 4240272    |          |     | 68.29    | 9.48      | 240        | 4636        | 124098   | 50          | 2        | 45          | 1        | 12       | 0 near     |
| 13_1_20CM_4_Verrucomicrobia_54_11            | 2851651    | 2851651    |          |     | 54.28    | 11.19     | 168        | 2830        | 65602    | 45          | 4        | 44          | 3        | 12       | 3 near     |
| 13_1_20CM_4_Chloroflexi_53_11                | 2649496    | 2649496    |          |     | 53.43    | 10.83     | 212        | 2525        | 35378    | 39          | 1        | 36          | 1        | 10       | 3 partial  |
| 13_1_20CM_4_Acidobacteria_57_11              | 2007395    | 2007395    |          |     | 56.79    | 10.59     | 164        | 1908        | 50789    | 1           | 0        | 3           | 1        | 2        | 1 partial  |
| 13_1_20CM_4_Chloroflexi_66_7                 | 652077     | 652077     |          |     | 66.27    | 6.79      | 64         | 700         | 19342    | 15          | 0        | 18          | 0        | 3        | 0 partial  |
| 13_1_20CM_4_Gemmatimonadetes_66_11           | 3107513    | 3107513    |          |     | 65.85    | 10.97     | 120        | 3112        | 132319   | 43          | 0        | 43          | 2        | 10       | 0 near     |
| 13_1_20CM_4_Archaea_Thermoplasmales_42_14    | 998369     | 998369     |          |     | 63.74    | 14.37     | 76         | 1124        | 43307    | 24          | 2        | 7           | 0        | 23       | 1 partial  |
| 13_1_20CM_4_Rokubacteria_70_14               | 3352455    | 3352455    |          |     | 69.93    | 14.22     | 177        | 3560        | 73047    | 36          | 3        | 36          | 2        | 10       | 0 partial  |
| 13_1_20CM_4_Actinobacteria_68_12             | 1425745    | 1425745    |          |     | 68.3     | 12.33     | 109        | 1545        | 29921    | 9           | 0        | 11          | 0        | 6        | 0 partial  |
| 13_1_20CM_4_Acidobacteria_56_7               | 2987195    | 2987195    |          |     | 55.52    | 6.97      | 239        | 2968        | 43113    | 44          | 10       | 40          | 6        | 12       | 4 partial  |
| 13_1_20CM_4_Verrucomicrobia_55_9             | 590700     | 590700     |          |     | 55.37    | 9.22      | 53         | 617         | 16557    | 15          | 2        | 9           | 1        | 4        | 0 partial  |
| 13_1_20CM_4_Actinobacteria_69_9              | 1895327    | 1895327    |          |     | 69.48    | 9.42      | 135        | 2236        | 37235    | 31          | 1        | 35          | 1        | 12       | 1 partial  |
| 13_1_20CM_4_Alphaproteobacteria_65_11        | 584984     | 584984     |          |     | 65.46    | 10.81     | 48         | 651         | 24206    | 28          | 0        | 26          | 0        | 3        | 0 partial  |
| 13_1_20CM_4_Armatimonadetes_65_7             | 197337     | 197337     |          |     | 64.5     | 6.74      | 18         | 216         | 16301    | 19          | 0        | 19          | 0        | 1        | 0 partial  |
| 13_1_20CM_4_Novel_66_15                      | 251877     | 251877     |          |     | 65.96    | 15.27     | 24         | 300         | 19140    | 21          | 0        | 18          | 0        | 0        | 0 partial  |
| 13_1_20CM_4_Nitrospirae_62_6                 | 285956     | 285956     |          |     | 62.32    | 5.76      | 26         |             |          |             |          |             |          |          |            |



Count 24 22 92%

Four days after first rain plot 1 30 - 40 cm

| Organism name                                | bin length | Partial to near |       | Bins/Meg | GC%   | coverage | # contigs | # features | longest contig | RP                    |             | BSCG                  |               | ASCG                  |               | completi<br>n status |
|----------------------------------------------|------------|-----------------|-------|----------|-------|----------|-----------|------------|----------------|-----------------------|-------------|-----------------------|---------------|-----------------------|---------------|----------------------|
|                                              |            | complete        | abins |          |       |          |           |            |                | Inventory (total: 55) | RP multiple | Inventory (total: 51) | BSCG multiple | Inventory (total: 38) | ASCG multiple |                      |
| 13_1_40cm_2_UNK                              | 1.43E+08   |                 |       |          | 59.61 | 6.35     | 67659     | 216865     | 114328         | 54                    | 51          | 51                    | 49            | 38                    | 38            | megabin              |
| 13_1_40CM_2_Rokubacteria_70_45               | 2114328    |                 |       |          | 69.87 | 45.08    | 328       | 2343       | 35736          | 41                    | 1           | 39                    | 0             | 11                    | 0             | partial              |
| 13_1_40CM_2_Myxococcales_68_15               | 1265159    |                 |       |          | 67.89 | 14.91    | 465       | 1445       | 10091          | 25                    | 1           | 22                    | 0             | 5                     | 1             | partial              |
| 13_1_40CM_2_Nitrospirae_megabin_61_8         | 5823452    |                 |       |          | 60.78 | 8.87     | 3435      | 7760       | 11081          | 46                    | 32          | 46                    | 34            | 14                    | 9             | megabin              |
| 13_1_40CM_2_Nitrospirae_62_10                | 2494038    | 2494038         |       |          | 61.7  | 10.15    | 657       | 2914       | 77373          | 40                    | 7           | 39                    | 0             | 11                    | 4             | partial              |
| 13_1_40CM_2_Deltaproteobacteria_megabin_63_4 | 49750827   |                 |       |          | 63.14 | 4.07     | 27770     | 62182      | 17117          | 53                    | 53          | 51                    | 51            | 18                    | 15            | megabin              |
| 13_1_40CM_2_Actinobacteria_megabin_67_3      | 35105913   |                 |       |          | 66.66 | 3.6      | 21490     | 47679      | 15721          | 52                    | 51          | 51                    | 50            | 17                    | 16            | megabin              |
| 13_1_40CM_2_Betaproteobacteria_megabin_64_4  | 27382188   |                 |       |          | 64.07 | 4.14     | 16233     | 37139      | 14544          | 53                    | 51          | 51                    | 48            | 15                    | 15            | megabin              |
| 13_1_40CM_2_Acidobacteria_megabin_59_4       | 68929204   |                 |       |          | 58.87 | 4.09     | 33803     | 79338      | 42138          | 53                    | 53          | 51                    | 51            | 17                    | 15            | megabin              |
| 13_1_40CM_2_Gemmatimonadetes_megabin_68_8    | 28624920   |                 |       |          | 68.02 | 8.43     | 12303     | 34511      | 95148          | 53                    | 53          | 51                    | 51            | 16                    | 15            | megabin              |
| 13_1_40CM_2_Methylomirabilis_megabin_69_6    | 36084836   |                 |       |          | 68.55 | 6.09     | 16527     | 48026      | 27622          | 53                    | 51          | 51                    | 49            | 15                    | 13            | megabin              |
| 13_1_40CM_2_Alphaproteobacteria_megabin_64_4 | 27267784   |                 |       |          | 63.69 | 3.84     | 16831     | 36203      | 19637          | 52                    | 48          | 47                    | 40            | 14                    | 9             | megabin              |
| 13_1_40CM_2_Proteobacteria_megabin_63_4      | 34476873   |                 |       |          | 63.35 | 4.77     | 15720     | 46249      | 27902          | 33                    | 20          | 25                    | 14            | 14                    | 8             | partial              |
| 13_1_40CM_2_Chloroflexi_megabin_53_3         | 13809904   |                 |       |          | 53.15 | 2.7      | 8294      | 17611      | 14175          | 52                    | 43          | 47                    | 30            | 16                    | 11            | megabin              |
| 13_1_40CM_2_Chloroflexi_megabin_67_4         | 19441263   |                 |       |          | 67.25 | 4.16     | 11131     | 24283      | 17754          | 51                    | 48          | 50                    | 47            | 17                    | 14            | megabin              |
| 13_1_40CM_2_Firmicutes_megabin_63_4          | 14433441   |                 |       |          | 62.96 | 4.69     | 9090      | 18208      | 10994          | 46                    | 41          | 45                    | 40            | 17                    | 14            | megabin              |
| 13_1_40CM_2_Ignavibacteria_61_4              | 3851097    |                 |       |          | 60.3  | 4.11     | 2044      | 4436       | 13884          | 39                    | 8           | 33                    | 4             | 9                     | 4             | partial              |
| 13_1_40CM_2_Verrucomicrobia_megabin_58_3     | 19328503   |                 |       |          | 57.95 | 3        | 10931     | 24193      | 17562          | 51                    | 50          | 50                    | 48            | 16                    | 16            | megabin              |
| 13_1_40CM_2_GAL15_megabin_65_7               | 6882473    |                 |       |          | 65.21 | 7.03     | 3817      | 9352       | 10836          | 46                    | 41          | 45                    | 36            | 14                    | 9             | megabin              |
| 13_1_40CM_2_Cyanobacteria_61_4               | 10911052   |                 |       |          | 60.78 | 3.89     | 6823      | 12402      | 12046          | 7                     | 2           | 3                     | 0             | 6                     | 1             | partial              |
| 13_1_40CM_2_NC10_megabin_66_5                | 9464986    |                 |       |          | 66.36 | 5.93     | 5393      | 12026      | 14113          | 21                    | 13          | 20                    | 16            | 11                    | 7             | partial              |
| 13_1_40CM_2_Thaumarchaeota_megabin_50_6      | 6701666    |                 |       |          | 50.23 | 5.59     | 3512      | 8650       | 22785          | 33                    | 27          | 22                    | 12            | 37                    | 34            | megabin              |
| 13_1_40CM_2_Euryarchaeota_megabin_60_9       | 15067302   |                 |       |          | 60.66 | 9.74     | 7783      | 18987      | 18991          | 44                    | 39          | 23                    | 21            | 38                    | 37            | megabin              |
| 13_1_40CM_2_Archaea_megabin_55_8             | 12657859   |                 |       |          | 54.73 | 7.85     | 4210      | 15908      | 103008         | 40                    | 38          | 23                    | 20            | 37                    | 37            | megabin              |
| 13_1_40CM_2_remainingbacteria_63_5           | 1.95E+08   |                 |       |          | 63.28 | 5.34     | 71600     | 259573     | 62572          | 53                    | 53          | 51                    | 51            | 23                    | 17            | megabin              |
| 13_1_40CM_2_Methylomirabilis_69_5            | 3726065    | 3726065         |       |          | 69.21 | 4.93     | 211       | 3960       | 69652          | 37                    | 3           | 33                    | 0             | 11                    | 1             | partial              |
| 13_1_40CM_2_Novel_65_8                       | 2449862    | 2449862         |       |          | 65.04 | 7.98     | 127       | 2628       | 70218          | 19                    | 1           | 21                    | 1             | 6                     | 0             | partial              |
| 13_1_40CM_2_Gemmatimonadetes_69_13           | 3942005    |                 |       |          | 69.21 | 13.15    | 197       | 3836       | 110443         | 45                    | 27          | 43                    | 24            | 11                    | 5             | megabin              |
| 13_1_40CM_2_Chloroflexi_67_6                 | 138770     | 138770          |       |          | 66.57 | 5.87     | 13        | 161        | 14111          | 16                    | 0           | 16                    | 0             | 0                     | 0             | partial              |
| 13_1_40CM_2_Acidobacteria_56_11              | 3224912    | 3224912         |       |          | 55.67 | 11       | 222       | 3173       | 57034          | 24                    | 1           | 26                    | 0             | 10                    | 0             | partial              |
| 13_1_40CM_2_Archaea_52_13                    | 1488827    | 1488827         |       |          | 51.89 | 12.98    | 78        | 1602       | 93184          | 19                    | 4           | 6                     | 0             | 17                    | 1             | partial              |
| 13_1_40CM_2_Novel_68_5                       | 3168729    | 3168729         |       |          | 68.18 | 4.92     | 212       | 2905       | 71726          | 18                    | 1           | 16                    | 0             | 6                     | 0             | partial              |
| 13_1_40CM_2_Chloroflexi_68_14                | 3059620    | 3059620         |       |          | 68.07 | 14.18    | 209       | 3129       | 97911          | 42                    | 6           | 42                    | 5             | 7                     | 2             | near                 |
| 13_1_40CM_2_Methylomirabilis_68_13           | 2347978    | 2347978         |       |          | 68.08 | 13.24    | 183       | 2583       | 52717          | 17                    | 0           | 16                    | 0             | 9                     | 0             | partial              |
| 13_1_40CM_2_Arch_MCG1_52_14                  | 1696268    | 1696268         |       |          | 51.74 | 13.93    | 68        | 1812       | 66664          | 30                    | 3           | 14                    | 0             | 31                    | 1             | near                 |
| 13_1_40CM_2_Archaea_52_4                     | 826954     | 826954          |       |          | 51.88 | 4.25     | 65        | 910        | 43421          | 9                     | 0           | 2                     | 0             | 12                    | 1             | partial              |
| 13_1_40CM_2_Acidobacteria_68_10              | 1923720    | 1923720         |       |          | 67.9  | 9.85     | 122       | 1819       | 67439          | 42                    | 2           | 39                    | 0             | 9                     | 0             | partial              |
| 13_1_40CM_2_Acidobacteria_60_7               | 1983623    | 1983623         |       |          | 60.23 | 7.18     | 151       | 1798       | 54929          | 38                    | 0           | 38                    | 0             | 10                    | 1             | partial              |
| 13_1_40CM_2_Acidobacteria_56_5               | 1151268    | 1151268         |       |          | 56.45 | 5.29     | 101       | 1131       | 31695          | 23                    | 0           | 21                    | 0             | 11                    | 0             | partial              |
| 13_1_40CM_2_Gemmatimonadetes_70_7            | 1657495    | 1657495         |       |          | 69.92 | 6.73     | 104       | 1687       | 62952          | 23                    | 0           | 21                    | 0             | 10                    | 0             | partial              |
| 13_1_40CM_2_Novel_66_13                      | 1142852    | 1142852         |       |          | 65.79 | 13.54    | 83        | 1233       | 30399          | 11                    | 0           | 13                    | 0             | 9                     | 0             | partial              |
| 13_1_40CM_2_Rokubacteria_68_8                | 2712366    | 2712366         |       |          | 68.41 | 7.93     | 184       | 2841       | 47280          | 32                    | 4           | 31                    | 1             | 9                     | 1             | partial              |
| 13_1_40CM_2_Novel_70_6                       | 1662566    | 1662566         |       |          | 70.3  | 6.27     | 112       | 1828       | 55037          | 27                    | 0           | 25                    | 0             | 7                     | 0             | partial              |
| 13_1_40CM_2_Archaea_SAGMCG_39_13             | 555171     |                 |       |          | 38.94 | 13.39    | 79        | 717        | 37220          | 24                    | 2           | 9                     | 0             | 20                    | 0             | partial              |
| 13_1_40CM_2_Archaea_39_4                     | 901546     |                 |       |          | 38.28 | 5.39     | 216       | 1108       | 40962          | 7                     | 1           | 3                     | 0             | 18                    | 1             | partial              |
| 13_1_40CM_2_Thaumarchaeota_39_13             | 804578     |                 |       |          | 39.12 | 13.61    | 124       | 956        | 33336          | 7                     | 0           | 4                     | 0             | 18                    | 1             | partial              |
| 13_1_40CM_2_Thaumarchaeota_SAGMCG_39_7       | 1042608    |                 |       |          | 38.64 | 6.6      | 216       | 1296       | 65502          | 29                    | 3           | 11                    | 0             | 25                    | 1             | partial              |
| 13_1_40CM_2_Gemmatimonadetes_60_3            | 1970774    |                 |       |          | 59.98 | 2.82     | 1121      | 2468       | 8804           | 41                    | 3           | 33                    | 8             | 8                     | 2             | partial              |
| 13_1_40CM_2_CNBR_64_6                        | 1458532    |                 |       |          | 64.29 | 6.23     | 411       | 1516       | 35568          | 45                    | 8           | 37                    | 5             | 9                     | 2             | partial              |
| Sum                                          | 8.35E+08   | 36855913        |       | 4%       |       |          |           |            |                |                       |             |                       |               |                       |               |                      |
| Count                                        | 49         | 18              |       | 37%      |       |          |           |            |                |                       |             |                       |               |                       |               |                      |

Six days after first rain plot 1 30 - 40 cm

| Organism name                                | bin length | Partial to near |       | Bins/Meg | GC%   | coverage | # contigs | # features | longest contig | RP                    |             | BSCG                  |               | ASCG                  |               | completi<br>n status |
|----------------------------------------------|------------|-----------------|-------|----------|-------|----------|-----------|------------|----------------|-----------------------|-------------|-----------------------|---------------|-----------------------|---------------|----------------------|
|                                              |            | complete        | abins |          |       |          |           |            |                | Inventory (total: 55) | RP multiple | Inventory (total: 51) | BSCG multiple | Inventory (total: 38) | ASCG multiple |                      |
| 13_1_40cm_3_UNK                              | 3.27E+08   |                 |       |          | 61.73 | 5.8      | 135383    | 461827     | 98346          | 54                    | 54          | 51                    | 51            | 38                    | 37            | megabin              |
| 13_1_40CM_3_Nitrospirae_megabin_61_8         | 7780444    |                 |       |          | 60.64 | 8.32     | 3888      | 10306      | 16887          | 49                    | 38          | 46                    | 31            | 13                    | 11            | megabin              |
| 13_1_40CM_3_Deltaproteobacteria_megabin_63_4 | 45996044   |                 |       |          | 63.41 | 4.38     | 24271     | 57282      | 48143          | 53                    | 53          | 51                    | 51            | 17                    | 16            | megabin              |
| 13_1_40CM_3_Betaproteobacteria_megabin_64_4  | 30007082   |                 |       |          | 64.33 | 4.46     | 16713     | 40253      | 17623          | 52                    | 51          | 51                    | 50            | 14                    | 14            | megabin              |
| 13_1_40CM_3_Alphaproteobacteria_megabin_63_4 | 22632200   |                 |       |          | 63.59 | 3.97     | 15557     | 34635      | 17217          | 52                    | 40          | 47                    | 31            | 12                    | 11            | megabin              |
| 13_1_40CM_3_Acidobacteria_megabin_59_4       | 72149664   |                 |       |          | 59.07 | 4.1      | 34109     | 83617      | 57326          | 53                    | 53          | 51                    | 51            | 16                    | 16            | megabin              |
| 13_1_40CM_3_Gemmatimonadetes_megabin_68_7    | 26328054   |                 |       |          | 67.61 | 7.58     | 11289     | 32036      | 198509         | 53                    | 53          | 51                    | 50            | 15                    | 15            | megabin              |
| 13_1_40CM_3_Gammaproteobacteria_megabin_63_4 | 14332085   |                 |       |          | 63.45 | 3.76     | 8742      | 17695      | 12592          | 46                    | 21          | 43                    | 17            | 14                    | megabin       |                      |
| 13_1_40CM_3_Methylomirabilis_megabin_69_6    | 36264118   |                 |       |          | 68.51 | 6.16     | 15508     | 48520      | 74444          | 52                    | 50          | 49                    | 48            | 16                    | 15            | megabin              |
| 13_1_40CM_3_Actinobacteria_megabin_67_4      | 32638971   |                 |       |          | 66.71 | 3.84     | 19104     | 43987      | 31322          | 53                    | 51          | 51                    | 51            | 17                    | 14            | megabin              |
| 13_1_40CM_3_Proteobacteria_megabin_64_5      | 23469994   |                 |       |          | 64.08 | 5.18     | 8011      | 33097      | 36505          | 26                    | 13          | 20                    | 9             | 8                     | 3             | partial              |
| 13_1_40CM_3_Chloroflexi_megabin_62_4         | 27175338   |                 |       |          | 62.49 | 3.83     | 15538     | 34491      | 22365          | 53                    | 52          | 50                    | 50            | 17                    | 13            | megabin              |
| 13_1_40CM_3_Verrucomicrobia_megabin_59_3     | 7914524    |                 |       |          | 59.16 | 3.07     | 5008      | 10025      | 12722          | 50                    | 44          | 41                    | 36            | 12                    | 10            | megabin              |
| 13_1_40CM_3_Verrucomicrobia_megabin_57_3     | 8612441    |                 |       |          | 56.64 | 3.33     | 4631      | 11154      | 14853          | 49                    | 47          | 47                    | 45            | 15                    | 14            | megabin              |
| 13_1_40CM_3_Euryarchaeota_megabin_60_9       | 13928608   |                 |       |          | 60.17 | 9.31     | 7444      | 18002      | 27367          | 40                    | 38          | 28                    | 20            | 38                    | 37            | megabin              |
| 13_1_40CM_3_Thaumarchaeota_megabin_48_6      | 6317791    |                 |       |          | 47.72 | 6.12     | 3391      | 8219       | 15561          | 32                    | 21          | 17                    | 9             | 37                    | 28            | megabin              |
| 13_1_40CM_3_Archaea_megabin_53_8             | 11906279   |                 |       |          | 55.15 | 7.91     | 4403      | 15468      | 71334          | 41                    | 37          | 22                    | 17            | 38                    | 36            | megabin              |
| 13_1_40CM_3_NC10_megabin_66_6                | 8950783    |                 |       |          | 66.22 | 5.66     | 4971      | 11403      | 14366          | 22                    | 13          | 21                    | 10            | 11                    | 9             | partial              |
| 13_1_40CM_3_Firmicutes_megabin_63_5          | 12579550   |                 |       |          | 62.87 | 4.55     | 7831      | 16129      | 12160          | 48                    | 47          | 48                    | 46            | 16                    | 13            | megabin              |
| 13_1_40CM_3_GAL15_megabin_65_7               | 6167310    |                 |       |          | 65.02 | 6.79     | 3273      | 8369       | 12975          | 50                    | 45          | 48                    | 40            | 15                    | 10            | megabin              |
| 13_1_40CM_3_Delftia_acidovorans_66_6         | 4671791    | 4671791         |       |          | 66.29 | 6.28     | 292       | 4559       | 60339          | 47                    | 1           | 44                    | 0             | 10                    | 0             | near                 |
| 13_1_40CM_3_Acidobacteria_55_5               | 2966753    | 2966753         |       |          | 55.17 | 4.51     | 176       | 2984       | 69897          | 16                    | 1           | 14                    | 0             | 8                     | 1             | partial              |
| 13_1_40CM_3_Gemmatimonadetes_66_12           | 2677766    | 2677766         |       |          | 65.73 | 12.16    | 128       | 2729       | 80773          | 19                    | 0           | 12                    | 0             | 10                    | 1             | partial              |
| 13_1_40CM_3_Novel_66_19                      | 1137225    | 1137225         |       |          | 65.6  | 19.49    | 84        | 1259       | 33927          | 10                    | 0           | 21                    | 0             | 6                     | 1             | partial              |
| 13_1_40CM_3_Gemmatimonadetes_70_8            | 720177     | 720177          |       |          | 69.53 | 8.2      | 65        | 747        | 21671          | 8                     | 0           | 9                     | 0             | 5                     | 0             | partial              |
| 13_1_40CM_3_Gemmatimonadetes_65_8            | 1964318    | 1964318         |       |          | 64.83 | 7.94     | 119       | 2022       | 40766          | 13                    | 0           | 11                    | 0             | 5                     | 1             | partial              |
| 13_1_40CM_3_Deltaproteobacteria_69_14        | 2823300    | 2823300         |       |          | 68.63 | 13.89    | 148</     |            |                |                       |             |                       |               |                       |               |                      |

|                                            |          |          |       |       |     |      |        |    |    |    |   |    |    |         |
|--------------------------------------------|----------|----------|-------|-------|-----|------|--------|----|----|----|---|----|----|---------|
| 13_1_40CM_3_Archaea_MCG_52_4               | 775972   | 775972   | 52.05 | 4.03  | 59  | 867  | 36390  | 23 | 3  | 5  | 0 | 14 | 0  | partial |
| 13_1_40CM_3_Nitrospirae_62_11              | 1100264  | 1100264  | 61.85 | 11.3  | 79  | 1152 | 29218  | 31 | 0  | 28 | 0 | 8  | 0  | partial |
| 13_1_40CM_3_Arch_MCG1_52_17                | 1771063  | 1771063  | 51.68 | 16.96 | 66  | 1902 | 127109 | 25 | 4  | 12 | 0 | 30 | 1  | partial |
| 13_1_40CM_3_Archaea_Thermoplasmatales_66_7 | 2325190  | 2325190  | 66.42 | 6.69  | 157 | 2433 | 50599  | 29 | 18 | 10 | 1 | 25 | 19 | partial |
| 13_1_40CM_3_Gemmatimonadetes_69_22         | 1685858  | 1685858  | 69.09 | 21.51 | 108 | 1762 | 42993  | 19 | 1  | 16 | 0 | 8  | 0  | partial |
| 13_1_40CM_3_Gemmatimonadetes_70_6          | 1589252  | 1589252  | 69.79 | 6.26  | 93  | 1575 | 51291  | 14 | 1  | 14 | 0 | 7  | 0  | partial |
| 13_1_40CM_3_Acidobacteria_65_5             | 3794804  | 3794804  | 65.06 | 4.65  | 304 | 3681 | 40292  | 24 | 0  | 21 | 0 | 5  | 0  | partial |
| 13_1_40CM_3_Chloroflexi_65_12              | 2380159  | 2380159  | 65.19 | 12.11 | 110 | 2574 | 69353  | 33 | 3  | 34 | 0 | 9  | 0  | partial |
| 13_1_40CM_3_Deltaproteobacteria_71_4       | 352886   | 352886   | 70.94 | 4.38  | 35  | 393  | 22504  | 25 | 0  | 24 | 0 | 2  | 0  | partial |
| 13_1_40CM_3_Acidobacteria_55_6             | 2366586  | 2366586  | 54.6  | 6.07  | 184 | 2326 | 37570  | 23 | 1  | 21 | 0 | 3  | 0  | partial |
| 13_1_40CM_3_Rokubacteria_69_38             | 2707031  | 2707031  | 69.53 | 37.81 | 362 | 3036 | 44365  | 42 | 3  | 41 | 0 | 11 | 2  | near    |
| 13_1_40CM_3_Novel_70_6                     | 559323   | 559323   | 69.7  | 6.22  | 49  | 636  | 23340  | 16 | 0  | 16 | 0 | 3  | 0  | partial |
| 13_1_40CM_3_Arch_MCG3_53_5                 | 2497406  | 2497406  | 52.84 | 5.35  | 88  | 2581 | 273886 | 34 | 12 | 16 | 2 | 35 | 3  | near    |
| 13_1_40CM_3_Arch_SCG1_50_5                 | 1626692  | 1626692  | 49.56 | 5.53  | 370 | 2046 | 62769  | 30 | 2  | 17 | 1 | 35 | 3  | near    |
| 13_1_40CM_3_Firmicutes_65_11               | 398295   |          | 65.39 | 11.43 | 186 | 517  | 8276   | 28 | 5  | 29 | 5 | 6  | 1  | partial |
| Sum                                        | 7.97E+08 | 49342450 | 6%    |       |     |      |        |    |    |    |   |    |    |         |
| Count                                      | 46       | 24       | 52%   |       |     |      |        |    |    |    |   |    |    |         |

2 days after second rain plot 1 30 - 40 cm

| Organism name                                 | bin length | Partial to<br>near<br>complete | Bins/Meg<br>abins | GC%   | coverage | # contigs | # features | longest<br>contig | RP                       |                | BSCG                     |                  | ASCG                     |                  | completion<br>status |
|-----------------------------------------------|------------|--------------------------------|-------------------|-------|----------|-----------|------------|-------------------|--------------------------|----------------|--------------------------|------------------|--------------------------|------------------|----------------------|
|                                               |            |                                |                   |       |          |           |            |                   | Inventory<br>(total: 55) | RP<br>multiple | Inventory<br>(total: 51) | BSCG<br>multiple | Inventory<br>(total: 38) | ASCG<br>multiple |                      |
| 13_1_40cm_4_UNK                               | 3.51E+08   |                                |                   | 62.07 | 5.82     | 133717    | 484839     | 105142            | 54                       | 53             | 51                       | 51               | 37                       | 36               | megabin              |
| 13_1_40CM_4_Nitrospirae_megabin_61_9          | 6042971    |                                |                   | 61.04 | 10.6     | 3234      | 7875       | 11659             | 47                       | 35             | 44                       | 27               | 13                       | 11               | megabin              |
| 13_1_40CM_4_Gemmatimonadetes_megabin_71_29    | 990116     |                                |                   | 70.5  | 28.81    | 429       | 1258       | 9774              | 37                       | 13             | 32                       | 7                | 6                        | 1                | partial              |
| 13_1_40CM_4_Deltaproteobacteria_megabin_68_18 | 1135657    |                                |                   | 67.75 | 17.56    | 488       | 1362       | 8774              | 20                       | 4              | 19                       | 2                | 6                        | 1                | partial              |
| 13_1_40CM_4_Methylobirabilis_megabin_68_6     | 26722786   |                                |                   | 68.01 | 6.84     | 11752     | 35806      | 61687             | 53                       | 51             | 51                       | 48               | 16                       | 14               | megabin              |
| 13_1_40CM_4_Deltaproteobacteria_megabin_63_4  | 39773945   |                                |                   | 63.35 | 4.4      | 21524     | 50604      | 22374             | 53                       | 52             | 51                       | 50               | 15                       | 15               | megabin              |
| 13_1_40CM_4_Euryarchaeota_megabin_60_10       | 13513956   |                                |                   | 60.02 | 10.44    | 6756      | 17102      | 30508             | 41                       | 38             | 25                       | 21               | 38                       | 37               | megabin              |
| 13_1_40CM_4_Thaumarchaeota_megabin_47_7       | 7325378    |                                |                   | 46.94 | 6.93     | 3666      | 9321       | 18666             | 33                       | 30             | 27                       | 11               | 36                       | 33               | megabin              |
| 13_1_40CM_4_Archaea_megabin_53_8              | 13838628   |                                |                   | 52.9  | 8.71     | 4580      | 17548      | 107010            | 39                       | 36             | 13                       | 17               | 38                       | 38               | megabin              |
| 13_1_40CM_4_Betaproteobacteria_megabin_64_5   | 22975250   |                                |                   | 64.04 | 4.75     | 12221     | 30853      | 18989             | 52                       | 51             | 49                       | 47               | 17                       | 14               | megabin              |
| 13_1_40CM_4_Alphaproteobacteria_megabin_63_4  | 22183612   |                                |                   | 63.51 | 4.25     | 13090     | 29656      | 15338             | 51                       | 42             | 47                       | 30               | 13                       | 6                | megabin              |
| 13_1_40CM_4_Proteobacteria_megabin_63_5       | 30948019   |                                |                   | 63.51 | 5.27     | 12845     | 41405      | 29121             | 26                       | 16             | 24                       | 15               | 14                       | 7                | partial              |
| 13_1_40CM_4_Acidobacteria_megabin_59_4        | 48644563   |                                |                   | 59.07 | 4.14     | 24467     | 57354      | 24222             | 53                       | 53             | 51                       | 51               | 17                       | 14               | megabin              |
| 13_1_40CM_4_Gemmatimonadetes_megabin_67_6     | 25359250   |                                |                   | 67.36 | 6.39     | 9501      | 29962      | 41164             | 53                       | 53             | 50                       | 50               | 14                       | 14               | megabin              |
| 13_1_40CM_4_Chloroflexi_megabin_67_5          | 17976645   |                                |                   | 66.76 | 5.06     | 9336      | 22315      | 24598             | 52                       | 48             | 49                       | 48               | 15                       | 13               | megabin              |
| 13_1_40CM_4_GAL15_megabin_65_7                | 6630185    |                                |                   | 64.75 | 6.97     | 3567      | 9093       | 10951             | 48                       | 39             | 47                       | 33               | 12                       | 7                | megabin              |
| 13_1_40CM_4_Chloroflexi_megabin_52_3          | 11429024   |                                |                   | 52.46 | 3.25     | 6253      | 14403      | 16950             | 53                       | 42             | 45                       | 38               | 14                       | 13               | megabin              |
| 13_1_40CM_4_Actinobacteria_megabin_66_4       | 30890358   |                                |                   | 66.24 | 4.24     | 16924     | 41333      | 26633             | 53                       | 52             | 51                       | 51               | 18                       | 15               | megabin              |
| 13_1_40CM_4_Verrucomicrobia_megabin_58_3      | 13591800   |                                |                   | 57.15 | 3.57     | 6918      | 17060      | 26719             | 50                       | 49             | 47                       | 46               | 16                       | 15               | megabin              |
| 13_1_40CM_4_Firmicutes_megabin_63_5           | 12583567   |                                |                   | 62.97 | 5.09     | 7463      | 15806      | 21644             | 52                       | 48             | 48                       | 45               | 17                       | 14               | megabin              |
| 13_1_40CM_4_Acidobacteria_57_6                | 1156824    | 1156824                        |                   | 57.09 | 5.85     | 98        | 1128       | 31165             | 14                       | 0              | 12                       | 0                | 2                        | 0                | partial              |
| 13_1_40CM_4_Chloroflexi_69_19                 | 530753     | 530753                         |                   | 68.88 | 19.46    | 48        | 606        | 28183             | 7                        | 0              | 8                        | 0                | 4                        | 0                | partial              |
| 13_1_40CM_4_Gemmatimonadetes_69_5             | 1233548    | 1233548                        |                   | 69.4  | 4.85     | 92        | 1310       | 91978             | 20                       | 0              | 16                       | 0                | 8                        | 0                | partial              |
| 13_1_40CM_4_Novel_65_12                       | 2726322    | 2726322                        |                   | 64.94 | 12.15    | 140       | 2862       | 73959             | 18                       | 3              | 18                       | 1                | 6                        | 0                | partial              |
| 13_1_40CM_4_Acidobacteria_56_10               | 4205805    | 4205805                        |                   | 55.6  | 10.24    | 241       | 4121       | 68800             | 44                       | 0              | 44                       | 0                | 13                       | 0                | near                 |
| 13_1_40CM_4_Arch_SCG_48_7                     | 1188454    | 1188454                        |                   | 48.38 | 7.36     | 70        | 1397       | 57055             | 26                       | 0              | 16                       | 1                | 28                       | 0                | partial              |
| 13_1_40CM_4_Acidobacteria_65_8                | 5226415    | 5226415                        |                   | 64.74 | 7.7      | 311       | 4667       | 74555             | 41                       | 3              | 36                       | 2                | 11                       | 1                | partial              |
| 13_1_40CM_4_Archaea_53_4                      | 1625991    | 1625991                        |                   | 52.89 | 4.13     | 91        | 1784       | 75806             | 27                       | 7              | 9                        | 1                | 19                       | 0                | partial              |
| 13_1_40CM_4_Nitrospirae_62_6                  | 1807939    | 1807939                        |                   | 61.5  | 6.31     | 108       | 1855       | 47416             | 43                       | 0              | 41                       | 0                | 10                       | 0                | near                 |
| 13_1_40CM_4_Gemmatimonadetes_65_7             | 2627923    | 2627923                        |                   | 64.75 | 6.99     | 187       | 2711       | 56521             | 19                       | 6              | 17                       | 4                | 7                        | 2                | partial              |
| 13_1_40CM_4_Rokubacteria_67_11                | 3898620    | 3898620                        |                   | 67.46 | 10.55    | 279       | 4212       | 50176             | 24                       | 7              | 23                       | 2                | 10                       | 2                | partial              |
| 13_1_40CM_4_Rokubacteria_69_39                | 2937267    | 2937267                        |                   | 69.31 | 38.59    | 356       | 3190       | 48727             | 42                       | 2              | 40                       | 0                | 11                       | 0                | partial              |
| 13_1_40CM_4_Gemmatimonadetes_69_8             | 6148271    |                                |                   | 69.07 | 8.46     | 252       | 5883       | 123742            | 53                       | 28             | 48                       | 24               | 12                       | 9                | megabin              |
| 13_1_40CM_4_Betaproteobacteria_64_4           | 1644455    | 1644455                        |                   | 64.63 | 4.4      | 136       | 1758       | 34171             | 28                       | 1              | 27                       | 1                | 4                        | 0                | partial              |
| 13_1_40CM_4_Chloroflexi_65_16                 | 1794243    | 1794243                        |                   | 65.28 | 16.01    | 121       | 1924       | 44587             | 38                       | 1              | 41                       | 1                | 10                       | 0                | near                 |
| 13_1_40CM_4_Rokubacteria_69_5                 | 4229972    | 4229972                        |                   | 69.01 | 5.17     | 189       | 4483       | 111011            | 46                       | 4              | 41                       | 0                | 13                       | 0                | near                 |
| 13_1_40CM_4_Chloroflexi_65_13                 | 499411     | 499411                         |                   | 65.04 | 12.75    | 22        | 537        | 68695             | 27                       | 0              | 28                       | 0                | 3                        | 0                | partial              |
| 13_1_40CM_4_Deltaproteobacteria_68_19         | 3477774    | 3477774                        |                   | 68.27 | 18.75    | 196       | 3509       | 75130             | 40                       | 2              | 38                       | 2                | 7                        | 0                | partial              |
| 13_1_40CM_4_Arch_SAGMCG_38_7                  | 1402295    | 1402295                        |                   | 38.15 | 6.65     | 76        | 1634       | 46615             | 29                       | 1              | 11                       | 0                | 30                       | 1                | partial              |
| 13_1_40CM_4_Chloroflexi_68_4                  | 3428701    | 3428701                        |                   | 67.67 | 4.42     | 203       | 3805       | 72344             | 42                       | 3              | 39                       | 3                | 9                        | 2                | partial              |
| 13_1_40CM_4_Acidobacteria_58_4                | 5659429    | 5659429                        |                   | 57.5  | 4.24     | 349       | 5490       | 79906             | 37                       | 12             | 38                       | 11               | 11                       | 6                | partial              |
| 13_1_40CM_4_Deltaproteobacteria_54_4          | 1210571    | 1210571                        |                   | 53.97 | 3.75     | 99        | 1319       | 34299             | 26                       | 0              | 25                       | 0                | 6                        | 0                | partial              |
| 13_1_40CM_4_Acidobacteria_61_5                | 1635232    | 1635232                        |                   | 60.85 | 5.06     | 125       | 1580       | 31777             | 26                       | 0              | 31                       | 0                | 10                       | 0                | partial              |
| 13_1_40CM_4_Chloroflexi_52_4                  | 1439464    | 1439464                        |                   | 51.85 | 3.84     | 124       | 1439       | 31027             | 20                       | 0              | 23                       | 1                | 3                        | 2                | partial              |
| 13_1_40CM_4_Rokubacteria_71_6                 | 4787378    | 4787378                        |                   | 70.85 | 6.09     | 299       | 5318       | 56297             | 19                       | 9              | 20                       | 5                | 9                        | 2                | partial              |
| 13_1_40CM_4_Verrucomicrobia_54_4              | 876475     | 876475                         |                   | 54.4  | 4.7      | 61        | 953        | 35517             | 22                       | 0              | 18                       | 0                | 6                        | 0                | partial              |
| 13_1_40CM_4_Novel_69_4                        | 1464472    | 1464472                        |                   | 68.8  | 3.96     | 116       | 1385       | 25996             | 16                       | 0              | 19                       | 0                | 7                        | 0                | partial              |
| Sum                                           | 7.72E+08   | 62715733                       | 8%                |       |          |           |            |                   |                          |                |                          |                  |                          |                  |                      |
| Count                                         | 47         | 26                             | 55%               |       |          |           |            |                   |                          |                |                          |                  |                          |                  |                      |

| Total for project            | bin length | Partial to<br>near<br>complete | Bins/Meg<br>abins | GC% |
|------------------------------|------------|--------------------------------|-------------------|-----|
| Sum                          | 6.7E+09    | 4.18E+08                       | 6%                |     |
| Count                        | 372        | 180                            | 48%               |     |
| Average size of genomes (bp) |            | 2.32E+06                       |                   |     |

Table S3b. Genomes recovered from soil, NCBI, and JGI-IMG databases by phylum

|                | (10/7/2015<br>Searched | (10/7/2015<br>Genome<br>Browser) | This<br>work |
|----------------|------------------------|----------------------------------|--------------|
| Actinobacteria | 991                    | 3755                             | 2            |

|                  |                 |       |    |
|------------------|-----------------|-------|----|
| Acidobacteria    | 24              | 26    | 8  |
| Proteobacteria   | 2392            | 12570 | 3  |
| Nitrospirae      | 15              | 14    | 3  |
|                  | (BioSam<br>ple) |       |    |
| Rokubacteria     |                 | 0     | 7  |
| Gemmatimonadetes | 6               | 4     | 2  |
| Chloroflexi      | 45              | 63    | 3  |
| Verrucomicrobia  | 39              | 45    | 2  |
| Armatimonadetes  | 3               | 4     | 1  |
| Crenarchaeota    | 69              | 138   | 4  |
| Thaumarchaeota   | 52              | 40    | 5  |
| Total            | 3636            | 16659 | 40 |
