# Supplementary material for: Proteogenomic analyses indicate bacterial methylotrophy and archaeal heterotrophy are prevalent below the grass root zone
Source: PubMed Central journal article supplement (PMC5103831; doi:10.7717/peerj.2687), 2016-11-08
Supplement: peerj-04-2687-s010.pdf [file peerj-04-2687-s010.pdf]

| Label <sup>1</sup>                  | Neutral Mass | Formula <sup>2</sup> | Sample Retention Time (min) | Standard <sup>3</sup> | Standard Retention Time | Ion (m/z) used for Sample Analyses <sup>4</sup> | Additional ions <sup>5</sup>                                                                                  | Largest MS/MS fragments <sup>6</sup>                                                                |
|-------------------------------------|--------------|----------------------|-----------------------------|-----------------------|-------------------------|-------------------------------------------------|---------------------------------------------------------------------------------------------------------------|-----------------------------------------------------------------------------------------------------|
| C5-Disaccharide (xylobiose) 1       | 282.0951     | C10H18O9             | 11.4                        | Xylobiose             | 11.3                    | [NEG, H-] 281.0878                              | [POS, Na+] 305.0841; [NEG, Cl-] 317.0641                                                                      |                                                                                                     |
| C5-Disaccharide (xylobiose) 2       | 282.0951     | C10H18O9             | 10.8                        | Xylobiose             | 10.7                    | [NEG, H-] 281.0878                              | [POS, Na+] 305.0841; [NEG, Cl-] 317.0641                                                                      |                                                                                                     |
| C12H22O10 (Rutinose) 1              | 326.1213     | C12H22O10            | 12                          | Rutinose              | 11.7,12.1               | [NEG, H-] 325.114                               | [POS, Na+] 349.1103                                                                                           | [NEG, 325.114 @ 20V] 163.0610, 103.0404; [POS, 349.1103 @ 20V] 149.0245                             |
| C12H22O10 (Rutinose) 2              | 326.1213     | C12H22O10            | 11.6                        | Rutinose              | 11.7,12.1               | [NEG, H-] 325.114                               | [POS, Na+] 349.1103                                                                                           | [NEG, 325.114 @ 20V] 163.0610, 103.0404; [POS, 349.1103 @ 20V] 149.0245                             |
| (C13H24O11)                         | 356.1319     | C13H24O11            | 10.8                        |                       |                         | [POS, NA+] 379.1198                             | [NEG, H-] 355.1246                                                                                            | [POS, 379.1121 @ 10V] 185.0417, 217.066                                                             |
| Sugar Alcohol 1 (Mannitol)          | 182.07904    | C6H14O6              | 10.4                        | Mannitol              | 10.6                    | [NEG, H-] 181.0718                              | [POS, H+] 183.0863                                                                                            | [NEG, 181.073 @ 20V] 80.9166, 71.0136, 89.0235, 101.0241                                            |
| Sugar Alcohol 2 (Xylitol)           | 152.06848    | C5H12O5              | 8.8                         | Xylitol               | 8.9                     | [NEG, H-] 151.0613                              |                                                                                                               | [NEG, 151.063 @ 10V] 89.0231, 101.0234, 71.0147, 73.029                                             |
| Sugar Alcohol 3 (Unk C5)            | 152.06848    | C5H12O5              | 7.9                         |                       |                         | [NEG, H-] 151.0613                              |                                                                                                               |                                                                                                     |
| Hexose 1 (Glucose/Galactose)        | 180.06339    | C6H12O6              | 10.2                        | 13C6-Glucose<br>ISTD  | 10.2                    | [NEG, H-] 179.0565                              | [NEG, Cl-] 215.0324, [NEG, +Hac-H] 239.0778                                                                   |                                                                                                     |
| Hexose 2 (Glucose/Galactose)        | 180.06339    | C6H12O6              | 10.8                        | 13C6-Glucose<br>ISTD  | 10.8                    | [NEG, H-] 179.0565                              | [NEG, Cl-] 215.0324, [NEG, +Hac-H] 239.0778                                                                   |                                                                                                     |
| (Hexose 3)                          | 180.06339    | C6H12O6              | 12                          |                       |                         | [NEG, H-] 179.0565                              | [NEG, Cl-] 215.0324, [NEG, +Hac-H] 239.0778                                                                   |                                                                                                     |
| (Hexose 4)                          | 180.06339    | C6H12O6              | 13.1                        |                       |                         | [NEG, H-] 179.0565                              | [NEG, Cl-] 215.0324, [NEG, +Hac-H] 239.0778                                                                   |                                                                                                     |
| (Hexose 5)                          | 180.06339    | C6H12O6              | 9.7                         |                       |                         | [NEG, H-] 179.0565                              | [NEG, Cl-] 215.0324, [NEG, +Hac-H] 239.0778                                                                   |                                                                                                     |
| Hexose 6 (Fructose)                 | 180.06339    | C6H12O6              | 9.1                         | Fructose              | 9                       | [POS, Na+] 203.0531                             | [NEG, H-] 179.0565; [NEG, Cl-] 215.0324 ;                                                                     |                                                                                                     |
| Hexose 7 (Mannose)                  | 180.06339    | C6H12O6              | 10.1                        | Mannose               | 10.4                    | [POS, Na+] 203.0531                             | [NEG, +Hac-H] 239.0778                                                                                        |                                                                                                     |
| Trehalose                           | 342.11622    | C12H22O11            | 13.8                        | D-(+)-Trehalose       | 13.8                    | [NEG,+Hac-H] 401.1302                           | [NEG, H-] 341.1096; [NEG, Cl-] 377.0852; [NEG, Fragment] 179.0565; [POS, Na+] 365.1062; [POS, NH4+] 360.1507  |                                                                                                     |
| Sucrose                             | 342.11622    | C12H22O11            | 12.6                        | Sucrose               | 12.7                    | [NEG, H-] 341.1096                              | [NEG, Cl-] 377.0852; [NEG,+Hac-H] 401.1302                                                                    |                                                                                                     |
| Disaccharide 3 (Cellobiose/Maltose) | 342.11622    | C12H22O11            | 13.4                        | Cellobiose/Maltose    | 13.2,13.4               | [NEG, H-] 341.1096                              | [NEG,+Hac-H] 401.1302; [NEG, Cl-] 377.0852; [POS, Na+] 365.1062; [POS, NH4+] 360.1507                         |                                                                                                     |
| (Disaccharide 6)                    | 342.11622    | C12H22O11            | 15.8                        |                       |                         | [POS, Na+] 365.1062                             | [POS, NH4+] 360.1490                                                                                          |                                                                                                     |
| Trisaccharide 1                     | 504.169      | C18H32O16            | 15.5                        |                       |                         | [NEG, H-] 503.162                               | [NEG, Cl-] 539.138; [NEG, +Hac-H] 563.1828; [POS, Na+] 527.1583; [POS, NH4+] 522.203                          | [NEG, 503.158 @ 20 V] 341.1074, 89.0238, 221.0667, 119.0371, 179.0555                               |
| Trisaccharide 2                     | 504.169      | C18H32O16            | 15                          | D-(+)-Raffinose       | 15                      | [NEG, H-] 503.162                               | [NEG, Cl-] 539.138; [NEG, +Hac-H] 563.1828; [POS, Na+] 527.1583; [POS, NH4+] 522.203                          |                                                                                                     |
| Trisaccharide 3                     | 504.169      | C18H32O16            | 14.3                        |                       |                         | [POS, Na+] 527.1583                             | [NEG, Cl-] 539.138; [NEG, +Hac-H] 563.1828, [NEG, H-] 503.162, [POS, NH4+] 522.203                            | [POS, 527.1583 @ 20V] 185.0407, 201.0367, 111.9523, 467.6755                                        |
| Trisaccharide 4                     | 504.169      | C18H32O16            | 13.7                        |                       |                         | [POS, Na+] 527.1583                             | [NEG, Cl-] 539.138; [NEG, +Hac-H] 563.1828, [NEG, H-] 503.162, [POS, NH4+] 522.203                            |                                                                                                     |
| Trisaccharide 5                     | 504.169      | C18H32O16            | 14.9                        |                       |                         | [NEG, H-] 503.162                               | [NEG, Cl-] 539.138; [NEG, +Hac-H] 563.1828; [POS, Na+] 527.1583; [POS, NH4+] 522.203                          |                                                                                                     |
| Trisaccharide 6                     | 504.169      | C18H32O16            | 13.1                        |                       |                         | [POS, Na+] 527.1583                             | [NEG, Cl-] 539.138; [NEG, +Hac-H] 563.1828, [NEG, H-] 503.162, [POS, NH4+] 522.203                            |                                                                                                     |
| Tetrasaccharide 1 (Maltotetraose)   | 666.22186    | C24H42O21            | 16                          | Maltotetraose         | 16                      | [NEG,H-] 665.2145                               | [POS, Na+] 689.2109; [POS, NH4+] 684.256; [NEG, Cl-] 701.191; [NEG, +Hac-H] 725.2357                          |                                                                                                     |
| Tetrasaccharide 2 (Stachyose)       | 666.22186    | C24H42O21            | 16.9                        | Stachyose             | 16.9                    | [NEG,H-] 665.2145                               | [POS, Na+] 689.2109; [POS, NH4+] 684.256; [NEG, Cl-] 701.191; [NEG, +Hac-H] 725.2357                          | [NEG, 665.2145 @40V] 89.025, 383.1175, 221.0661, 179.0565; [POS, 689.2109 @ 40V] 527.1577, 365.1028 |
| Tetrasaccharide 3                   | 666.22186    | C24H42O21            | 16.3                        |                       |                         | [NEG,H-] 665.2145                               | [POS, Na+] 689.2109; [POS, NH4+] 684.256; [NEG, +Hac-H] 725.2357                                              |                                                                                                     |
| Tetrasaccharide 4                   | 666.22186    | C24H42O21            | 14.9                        |                       |                         | [NEG,H-] 665.2145                               | [POS, Na+] 689.2109; [POS, NH4+] 684.256                                                                      |                                                                                                     |
| Tetrasaccharide 6                   | 666.22186    | C24H42O21            | 14.5                        |                       |                         | [POS, Na+] 689.2109                             | [POS, fragment] 527.1582 ;[NEG, H-] 665.2145; [POS, NH4+] 684.256; [NEG, Cl-] 701.191; [NEG, +Hac-H] 725.2357 |                                                                                                     |
| Pentasaccharide 1                   | 828.2747     | C30H52O26            | 16.8                        | Maltopentose          | 17                      | [NEG, H-] 827.2663                              | [POS, Na+] 851.2637; [NEG, Cl-] 863.2437; [NEG, +Hac-H] 887.2885                                              | [NEG, 827.2663 @ 40V] 383.1167, 323.0973, 647.1953, 131.0314                                        |

|                            |            |             |      |                            |      |                          |                                                                  |                                                                 |
|----------------------------|------------|-------------|------|----------------------------|------|--------------------------|------------------------------------------------------------------|-----------------------------------------------------------------|
| Pentasaccharide 2          | 828.2747   | C30H52O26   | 17.8 |                            |      | [NEG, H-] 827.2663       | [POS, Na+] 851.2637                                              | [NEG, 827.2663 @ 40V] 383.1168, 179.0580, 647.1998, 443.099     |
| Pentasaccharide 3          | 828.2747   | C30H52O26   | 15.5 |                            |      | [NEG, H-] 827.2663       | [POS, Na+] 851.2637                                              |                                                                 |
| Hexasaccharide 1           | 990.3275   | C36H62O31   | 17.3 | Maltohexose                | 17.3 | [POS, NH4+] 1008.3619    | [NEG, H-] 989.3202; [POS, Na+] 1013.3165; [NEG, H-H2O-] 971.3003 |                                                                 |
| Hexasaccharide 2           | 990.3275   | C36H62O31   | 18.6 |                            |      | [POS, NH4+] 1008.3619    | [NEG, H-] 989.3202; [POS, Na+] 1013.3165                         |                                                                 |
| Tryptophan                 | 204.08988  | C11H12N2O2  | 9.3  | L-Tryptophan, D-Tryptophan | 9.4  | [NEG, H-] 203.0826       | [POS, H+] 205.0972                                               |                                                                 |
| L-Leucine                  | 131.09463  | C6H13NO2    | 8.8  | L-Isoleucine               | 8.7  | [NEG, H-] 130.0874       | [POS, H+] 132.1022                                               |                                                                 |
| L-Isoleucine               | 131.09463  | C6H13NO2    | 8.4  | L-Leucine                  | 8.4  | [NEG, H-] 130.0874       | [POS, H+] 132.1022                                               |                                                                 |
| Valine                     | 117.07898  | C5H11NO2    | 9.8  | L-Valine                   | 9.9  | [NEG, H-] 116.0717       | [POS, H+] 118.0864                                               |                                                                 |
| Phenylalanine              | 165.07898  | C9H11NO2    | 8.4  | L-Phenylalanine            | 8.5  | [NEG, H-] 164.0717       | [POS, H+] 166.0863                                               |                                                                 |
| (Sarcosine)                | 89.04768   | C3H7NO2     | 11.5 | Sarcosine                  | 11.2 | [POS, H+] 90.0551        | [NEG, H-] 88.0403                                                |                                                                 |
| (N-acetyl-l-phenylalanine) | 207.08954  | C11H13NO3   | 4.4  | N-Acetyl-L-Phenylalanine   | 4.5  | [NEG, H-] 206.08226      |                                                                  |                                                                 |
| (4-aminobutanoate)         | 103.06333  | C4H9NO2     | 12.6 | 4-Aminobutanoate           | 12.9 | [POS, H+] 104.0706       |                                                                  |                                                                 |
| Proline                    | 115.06333  | C5H9NO2     | 9.4  | L-Proline                  | 9.3  | [NEG, H-] 114.056        | [POS, H+] 116.0707                                               |                                                                 |
| Tyrosine                   | 181.07389  | C9H11NO3    | 10.6 | L-Tyrosine                 | 10.5 | [NEG, H-] 180.067        | [POS, H+] 182.0813                                               |                                                                 |
| Deoxyguanosine             | 267.0968   | C10H13N5O4  | 7.9  | Deoxyguanosine             | 7.9  | [POS, fragment] 151.0494 | [POS, H+] 268.1031                                               |                                                                 |
| L-Carnitine                | 161.10519  | C7H15NO3    | 10.4 | L-Carnitine                | 10.5 | [POS, H+] 162.1125       | [POS, Na+] 184.0942                                              | [POS 162.1125 @ 10V] 85.0244, 60.081, 65.025, 121.0465, 103.040 |
| Acetylcarnitine            | 203.1158   | C9H17NO4    | 7.8  | O-Acetyl-L-carnitine       | 7.8  | [POS, H+] 204.123        | [POS, fragment] 162.113                                          | [POS, 204.123 @ 10V] 85.0273, 145.0508                          |
| (C8H16N2O3)                | 188.11609  | C8H16N2O3   | 8.6  |                            |      | [POS, H+] 189.1233       |                                                                  | [POS, 189.1243 @ 10V] 130.0499, 85.0285, 60.0804                |
| (N6-Acetyl-lysine)         | 188.11609  | (C8H16N2O3) | 10.4 | N6-Acetyl-lysine           | 11   | [POS, H+] 189.1233       |                                                                  | [POS, 189.1243 @ 10V] 84.0797, 126.0903                         |
| Betaine                    | 117.07898  | C5H11NO2    | 7    | betaine (glycine-betaine)  | 7.6  | [POS, H+] 118.0864       | [POS, NA+] 140.0682, [POS, fragment] 100.076                     |                                                                 |
| (C8H16N2O3)2               | 188.11609  | (C8H16N2O3) | 9.5  |                            |      | [POS, H+] 189.1233       |                                                                  |                                                                 |
| Glutamine                  | 146.06914  | C5H10N2O3   | 13   | L-Glutamine                | 13.2 | [NEG, H-] 145.0618       | [POS, H+] 147.0766                                               |                                                                 |
| Cytidine                   | 265.067424 | C9H13N3O5   | 8.2  | Cytidine                   | 8.2  | [POS, H+] 266.0747       | [POS, fragment] 112.0504                                         |                                                                 |
| Asparagine                 | 132.1179   | C4H8N2O3    | 13.1 | L-Asparagine               | 13.2 | [POS, H+] 133.1251       |                                                                  |                                                                 |
| Ectoine                    | 142.0742   | C6H10N2O2   | 9.6  | Ectoine                    | 9.9  | [POS, H+] 143.0815       |                                                                  |                                                                 |
| Cytosine                   | 111.04326  | C4H5N3O     | 6.7  | Cytosine                   | 7.2  | [POS, H+] 112.0505       |                                                                  |                                                                 |
| Deoxycytidine              | 227.09061  | C9H13N3O4   | 6.6  | Deoxycytidine              | 7.2  | [POS, H+] 228.0979       | [POS, fragment] 112.0504                                         |                                                                 |
| Adenine                    | 135.0545   | C5H5N5      | 5    | Adenine                    | 5.1  | [POS, H+] 136.0618       |                                                                  |                                                                 |
| Inosine                    | 268.08077  | C10H12N4O5  | 7.9  | Inosine                    | 7.5  | [POS, fragment] 137.0456 |                                                                  |                                                                 |
| Choline-O-Sulfate          | 183.056914 | C5H13NO4S   | 6.1  | Cholinesulfate             | 6.1  | [POS, H+] 184.0642       | [POS, fragment] 104.1076                                         | [POS, 184.0642 @ 10V] 104.1073                                  |
| Uridine                    | 244.0695   | C9H12N2O6   | 5.4  | Uridine                    | 5.6  | [POS, H+] 245.0768       | [NEG, H-] 243.0623                                               |                                                                 |
| Deoxyadenosine             | 251.1018   | C10H13N5O3  | 4.2  | 2'-Deoxyadenosine          | 4.4  | [POS, H+] 252.1095       | [POS, fragment] 136.062                                          |                                                                 |
| Adenosine                  | 267.09676  | C10H13N5O4  | 5.1  | Adenosine                  | 5.3  | [POS, H+] 268.1040       |                                                                  |                                                                 |
| Uracil                     | 112.02728  | C4H4N2O2    | 3.4  | Uracil                     | 3.8  | [NEG, H-] 111.021        |                                                                  |                                                                 |
| Hypoxanthine               | 136.03851  | C5H4N4O     | 5.7  | Hypoxanthine               | 6.2  | [POS, H+] 137.0458       |                                                                  |                                                                 |
| Deoxyuridine               | 228.07462  | C9H12N2O5   | 3.6  | Deoxyuridine               | 4    | [NEG, H-] 227.0673       | [NEG, fragment] 111.021                                          |                                                                 |
| Serine                     | 105.0926   | C3H7NO3     | 13.1 | L-Serine                   | 13.2 | [NEG, H-] 104.036        |                                                                  |                                                                 |
| Guanosine                  | 283.09167  | C10H13N5O5  | 9.3  | Guanosine                  | 9.7  | [POS, H+] 284.099        |                                                                  |                                                                 |
| (C6H11NO3)                 | 145.0739   | (C6H11NO3)  | 8.9  |                            |      | [POS, H+] 146.0812       | [POS, fragment] 100.0756, [NEG, H-] 144.066                      |                                                                 |

#### Extraction Standards

| Name                        | Neutral Mass | Formula     | Retention Time (min) | Positive Ions       | Negative Ions       |
|-----------------------------|--------------|-------------|----------------------|---------------------|---------------------|
| ABMBA                       | 228.9738     | C8H8BrNO2   | 2.99                 | [POS, H+] 229.9811  | [NEG, H-] 227.9666  |
| UL-13C-Glucose              | 186.0814     | [13C]6H12O6 | 10.2, 10.8           | [POS, Na+] 209.0704 | [NEG, H-] 185.25411 |
| <b>Internal Standards</b>   |              |             |                      |                     |                     |
| 9-antracene carboxylic acid | 222.068085   | C15H10O2    | 3.11                 |                     | [NEG, H-] 221.0608  |
| d5-benzoic acid             | 127.068161   | C7HD5O2     | 4.5                  |                     | [NEG, H-] 126.0609  |

|                                     |            |                  |      |                       |                       |
|-------------------------------------|------------|------------------|------|-----------------------|-----------------------|
| 3,6-Dihydroxy-4-methylpyridazine    | 126.042931 | C5H6N2O2         | 6.1  | [POS, H+]<br>127.0503 | [NEG, H-]<br>125.0357 |
| 4-(3,3-dimethyl-ureido)benzoic acid | 208.084793 | C10H12N2O3       | 6.7  | [POS, H+]<br>209.0921 | [NEG, H-]<br>207.0775 |
| 13C-15N-L-phenylalanine             | 175.106201 | [13C]9H11[15N]O2 | 8.4  | [POS, H+]<br>176.1135 | [NEG, H-]<br>174.0989 |
| d4 lysine                           | 150.13063  | C6H10D4N2O2      | 23.7 | [POS, H+]<br>151.1379 | [NEG, H-]<br>149.1233 |

1 - Corresponds to the label in the heat map

2 - Compound formulas are derived from compound if known, otherwise it was from a combination of isotope patterns, neutral losses, elution time and MS/MS if available

3 - Standards from the Northern Lab chemical library that were analyzed using the same column and gradient

4 - ions (m/z values) used for evaluating compounds across samples were selected based on their sensitivities and CV among replicate analyses

5 - Additional co-eluting ions that were used to confirm compound, neutral mass and type

6 - Selected MS/MS patterns observed on sample compounds that were present at sufficient abundance.
