# Supplementary material for: Proteogenomic analyses indicate bacterial methylotrophy and archaeal heterotrophy are prevalent below the grass root zone
Source: PubMed Central journal article supplement (PMC5103831; doi:10.7717/peerj.2687), 2016-11-08
Supplement: peerj-04-2687-s011.pdf [file peerj-04-2687-s011.pdf]

|                   |                       |     |          |          |          |          |          |          |          |          |          |          |          |          |          |          |          |           |           |          |          |          |          |          |          |          |          |          |          |          |          |
|-------------------|-----------------------|-----|----------|----------|----------|----------|----------|----------|----------|----------|----------|----------|----------|----------|----------|----------|----------|-----------|-----------|----------|----------|----------|----------|----------|----------|----------|----------|----------|----------|----------|----------|
| Inosine           | Nucleotide/Nucleoside | POS | 23378.08 | 15054.47 | 42364.8  | 25845.67 | 10922.45 | 10881.62 | 10518.74 | 30945.31 | 30209.9  | 17796.86 | 9161.84  | 7090.76  | 7520.01  | 23650.9  | 12647.82 | 8180.14   | 531.83    | 972.63   | 725.97   | 59511.93 | 67861.88 | 64417.56 | 43500.27 | 21049.14 | 32462.19 | 0        | 5021.15  | 0        | 29.35    |
| Uracil            | Nucleotide/Nucleoside | NEG | 383185.7 | 221893   | 793999   | 902187.4 | 485162.7 | 448530.4 | 72923.3  | 294063.4 | 197389.9 | 291576.7 | 226425.8 | 199633.7 | 158482.3 | 237455.1 | 236690.9 | 230501.3  | 147026.5  | 41203.26 | 155030.9 | 972617   | 886035.4 | 1219827  | 1198663  | 575252.1 | 938049   | 6396.61  | 2432.83  | 5730.69  | 6117.75  |
| Uridine           | Nucleotide/Nucleoside | POS | 20285.57 | 18149.59 | 33246.27 | 30518.66 | 5723.24  | 8217.78  | 5000.45  | 5926.71  | 6286.3   | 5988.87  | 3686.25  | 7483.68  | 5157.48  | 6510.15  | 5974.27  | 3907.18   | 0.01      | 118.82   | 7.62     | 80063.18 | 94019.96 | 103809.5 | 54918.71 | 25857.3  | 37947.01 | 0        | 0        | 0        | 0        |
| Ecotine           | Osmolyte              | POS | 264784.2 | 256857.9 | 248276.2 | 233206.8 | 312157.2 | 251620.1 | 240003.9 | 214713.6 | 248738.6 | 185597.2 | 237278.4 | 198424   | 244251.6 | 176480.9 | 192952.9 | 161659.5  | 247739.7  | 222092.7 | 151928.2 | 458931.2 | 520549.5 | 653291.3 | 775975   | 797177.6 | 472233   | 180066.1 | 232691.7 | 253949.9 | 189669.2 |
| (CBH16N2D3)       | Peptide               | POS | 151576.1 | 128902.3 | 240971.9 | 289237.9 | 192417.6 | 182483.9 | 204266.3 | 93209.37 | 101999.7 | 74402.7  | 163051.5 | 87145.68 | 95641.71 | 73079.1  | 70031.32 | 76097.26  | 57054.67  | 58388.87 | 79255.75 | 188382.2 | 2178719  | 2121215  | 2693786  | 4950854  | 2736149  | 50618.03 | 33499.48 | 331428.7 | 49526.26 |
| (CBH16N2D3)2      | Peptide               | POS | 82703.44 | 59596.21 | 96564.67 | 98844.77 | 101345.8 | 64280.97 | 63622.99 | 93960.77 | 118094.9 | 70086.76 | 120051   | 69643.81 | 67528.23 | 64035.35 | 74452.74 | 67841.2   | 64498.69  | 58124.68 | 65571.27 | 240568.5 | 226873.6 | 207431.7 | 241963   | 681061.8 | 200411.8 | 50014.93 | 44091.15 | 202050.6 | 46386.52 |
| Acetylcarbamine   | Quaternary NH4        | POS | 53488.37 | 30247.55 | 61352.58 | 44455.31 | 132824   | 116427.3 | 130742.8 | 39646.23 | 35062.46 | 35175.53 | 28845.33 | 90432.53 | 30611.96 | 34336.32 | 39073.28 | 128705.51 | 385125.51 | 29934.49 | 10376.34 | 1442478  | 1837451  | 1660050  | 2127274  | 3165266  | 2182013  | 247987   | 9311.3   | 116070.6 | 31120.42 |
| Betaine           | Quaternary NH4        | POS | 1372897  | 12596797 | 15136764 | 13981470 | 14696930 | 13462987 | 13548108 | 10726439 | 12139518 | 11490009 | 1237869  | 12121046 | 12216783 | 11421665 | 12052778 | 11024367  | 10773151  | 12123819 | 11522416 | 35788439 | 40603449 | 48661556 | 49832039 | 44145727 | 41187825 | 19122881 | 18823573 | 17422929 | 18850319 |
| Choline Disulfate | Quaternary NH4        | POS | 1733423  | 1379850  | 3399794  | 2335394  | 3251880  | 4102807  | 3525631  | 420924.5 | 444495.3 | 487036.3 | 889389.3 | 772939.2 | 964499.1 | 837467.4 | 648822.5 | 451231.6  | 576837.5  | 763858.6 | 663950.8 | 14525817 | 17494934 | 20022384 | 22754298 | 22432681 | 18901704 | 86.94    | 13.79    | 304.43   | 231.59   |
| L-Carnitine       | Quaternary NH4        | POS | 175308.6 | 175397.7 | 316178.8 | 59203.4  | 880744.3 | 696221.4 | 944005.2 | 173174.2 | 154775.1 | 103640.5 | 299318.7 | 126717.4 | 159317.9 | 122611.1 | 123623.5 | 110590.8  | 127415.4  | 112846   | 112904.1 | 2051143  | 22843837 | 26257846 | 11869665 | 21745474 | 10118362 | 92021.55 | 67355.6  | 488751.2 | 79015.82 |
| (Garcosine)       | metabolism            | POS | 186160.1 | 126382.4 | 255192.6 | 188802.8 | 370507.5 | 175311.2 | 175611.8 | 282283.4 | 300842   | 189131.8 | 293972.1 | 158577.5 | 156667.3 | 165198.9 | 187477.5 | 126244.6  | 197582    | 135374.2 | 214525.6 | 502256.2 | 418773.5 | 487769   | 657595.6 | 1356170  | 158882.7 | 106198.1 | 99955.57 | 165875.7 | 104185.9 |
| Serine            | Amino acid            | POS | 48151.92 | 46072.13 | 46199.22 | 58445.64 | 50316.84 | 36572.07 | 37205.82 | 30507.11 | 34688.96 | 29745.24 | 147304.3 | 39108.16 | 33431.71 | 28708.58 | 33970.77 | 34804.67  | 22981.61  | 15862.82 | 96903.2  | 78699.63 | 71088.18 | 88784.73 | 88480.71 | 150229.3 | 76849.47 | 15857.56 | 15722.25 | 25183.37 | 14587.82 |
| Asparagine        | Amino acid            | POS | 1570.63  | 1559.38  | 4944.49  | 4823.55  | 6959.77  | 4197.35  | 7937.43  | 1835.82  | 998.27   | 449.22   | 15862.93 | 2268.42  | 315.76   | 1004.31  | 538.64   | 313.32    | 428.89    | 184.98   | 3940     | 175871.4 | 177577   | 150381.2 | 140037.4 | 3186439  | 159665.7 | 632.11   | 1061.41  | 1050.26  | 832.55   |
| (N-Acetyllysine)  | Amino acid            | POS | 145737.4 | 123371.2 | 246928.5 | 277019.6 | 206955   | 177599.1 | 201780.2 | 85074.45 | 88813.2  | 67662.9  | 146894.7 | 79971.78 | 88023.01 | 67700.46 | 61965.35 | 67630.97  | 50733.57  | 51078.3  | 72058.98 | 1883759  | 2199165  | 2155243  | 2708090  | 4990170  | 2757981  | 47983.26 | 29820.2  | 316230   | 45325.19 |
