# Supplementary material for: Proteogenomic analyses indicate bacterial methylotrophy and archaeal heterotrophy are prevalent below the grass root zone
Source: PeerJ journal article supplement (doi:10.7717/peerj.2687), 2016-11-08
Supplement: TS4_2013_Plant_Assemblage.pdf [file TS4_2013_Plant_Assemblage.pdf]

| Genus and Species               | Common Name                 | Origin     | Life History            | Flowering Seasonality | 2013 Abundance       |
|---------------------------------|-----------------------------|------------|-------------------------|-----------------------|----------------------|
| (Eremocarpus) Croton setigerus  | Turkey Mullein              | Native     | Annual Forb             | Late Summer           | High                 |
| (Linanthus) Leptosiphon bicolor | Linanthus, True Babystars   | Native     | Annual Forb             | Spring                | Low                  |
| Achillea millefolium            | Yarrow                      | Native     | Perennial Forb          | Late Summer           | Southern margin only |
| Aira caryophylla                | Shiver grass                | Introduced | Annual Grass            | Early Summer          | Low                  |
| Aphanes occidentalis            | Lady's Mantle               | Native     | Annual Forb             | Spring                | Moderate             |
| Avena barbata                   | Slender wild oats           | Introduced | Annual Grass            | Early Summer          | Trace                |
| Briza minor                     | Little quakinggrass         | Introduced | Annual Grass            | Early Summer          | Low                  |
| Broadiaea elegans               | Elegant Clusterlily         | Native     | Bulb (Liliaceae)        | Early Summer          | Moderate             |
| Bromus carinatus                | California brome            | Native     | Annual/Short-lived      | Early Summer          | Trace                |
| Bromus diandrus                 | Ripgut grass                | Introduced | Annual Grass            | Early Summer          | Moderate             |
| Bromus hordeaceus               | Soft Chess                  | Introduced | Annual Grass            | Early Summer          | Very High            |
| Bromus madritensis              | Red Brome, Foxtail Chess    | Introduced | Annual Grass            | Early Summer          | Trace                |
| Bromus tectorum                 | Cheatgrass                  | Introduced | Annual Grass            | Early Summer          | Low                  |
| Cardamine oligosperma           | Bitter-cress                | Native     | Annual Forb             | Spring                | Trace                |
| Castilleja attenuata            | Owl Clover                  | Native     | Annual Forb             | Early Summer          | Low                  |
| Cerastium glomeratum            | Mouse-ear Chickweed         | Introduced | Annual Forb             | Early Summer          | Low                  |
| Cirsium occidentale             | Cobwebby Thistle            | Native     | Perennial Forb          | Early Summer          | Trace                |
| Clarkia purpurea                |                             | Native     | Annual Forb             | Spring                | Moderate             |
| Convolvus arvensis              | Bindweed, Morning glory     | Introduced | Perennial Forb          | Summer                | Trace                |
| Cynosurus echinatus             | Hedgehog dogtail            | Introduced | Annual Grass            | Summer                | Moderate             |
| Danthonia californica           | California oatgrass         | Native     | Perennial Grass         | Summer                | High                 |
| Daucus pusillus                 | Wild Carrot                 | Native     | Annual or Biennial Forb | Summer                | Moderate             |
| Dichelostemma capitatum         | Blue Dicks                  | Native     | Bulb (Liliaceae)        | Early Summer          | Moderate             |
| Draba verna                     | Spring Draba                | Native     | Annual Forb             | Spring                | Trace                |
| Elymus glaucus                  | Blue wildrye                | Native     | Perennial Grass         | Summer                | Southern margin only |
| Elymus multisetus               | Big Squirreltail grass      | Native     | Perennial Grass         | Summer                | Low                  |
| Epilobium brachycarpum          |                             | Native     | Annual Forb             | Late Summer           | Low                  |
| Erodium cicutarium              | Redstem Filaree, storksbill | Introduced | Annual Forb             | Early Spring          | High                 |
| Eschscholzia californica        | California poppy            | Native     | Perennial Forb          | All year              | High                 |
| Gallium parisiense              | Wall bedstraw               | Introduced | Annual Forb             | Early summer          | Very High            |
| Gastidium ventricosum           | Nitgrass                    | Introduced | Annual Grass            | Early Summer          | Trace                |
| Geranium dissectum              | storks bill                 | Introduced | Annual Forb             | Spring                | Low                  |
| Hemizonia congesta              | Hayfield tarweed            | Native     | Annual Forb             | Summer                | Trace                |
| Hypochaeris glabra              | Smooth Cat's Ear            | Introduced | Annual Forb             | Summer                | Low                  |
| Lotus micranthus                |                             | Native     | N-fixer                 | Early Summer          | Very High            |
| Lotus wrangelianus              | Yellow Lotus                | Native     | N-fixer                 | Early Summer          | Low                  |
| Lupinus bicolor                 | Annual Lupine               | Native     | Annual Forb             | Early Summer          | High                 |
| Madia gracilis                  | Slender Tarweed             | Native     | Annual Forb             | Mid Summer            | Low                  |
| Micropus californicus           | Slender cottonweed          | Native     | Annual Forb             | Early Summer          | Trace                |
| Myosotis discolor               | Changing Forget-me-not      | Introduced | Annual/Biennial Forb    | Spring                | Trace                |
| Navarretia divaricata           | Mountain Navarretia         | Native     | Annual Forb             | Spring                | Trace                |
| Plagiobothrys nothofulvus       | Popcorn flower              | Native     | Annual Forb             | Spring                | Moderate             |
| Platystemon californicus        | Cream cups                  | Native     | Annual Forb             | Early Summer          | Trace                |
| Ranunculus occidentalis         | Western Buttercup           | Native     | Perennial Forb          | Spring                | Trace                |
| Rumex acetosella                | Sheep sorrel                | Introduced | Perennial Forb          | All year              | High                 |
| Sanicula bipinnatifida          | Purple sanicle              | Native     | Perennial Forb          | All year              | High                 |
| Sherardia arvensis              |                             |            | Annual Forb             | Early Spring          | High                 |
| Stachys ajugoides               |                             | Native     | Perennial Forb          | Mid Summer            | Trace                |
| Torilis arvensis                | Field Hedge Parsley         | Introduced | Annual Forb             | Mid Summer            | Low                  |
| Trichostema lanceolatum         | Vinegarweed                 | Native     | Annual Forb             | Late Summer           | Very High            |
| Trifolium alborpurpureum        |                             | Native     | Annual N-fixer          | Early Summer          | Moderate             |
| Trifolium bifidum               |                             | Native     | Annual N-fixer          | Early Summer          | Low                  |
| Trifolium microcephalum         |                             | Native     | Annual N-fixer          | Early Summer          | Moderate             |
| Trifolium willdenovii           |                             | Native     | Annual N-fixer          | Early Summer          | Low                  |
| Vulpia myuros                   |                             | Introduced | Annual Grass            | Early Summer          | Very High            |

Particularly abundant at site within meadow:

= Flowering end of August, secescing into September and October

= Dead and senescing tissues August through October
